# Supplementary material for: Rotational conformers and nuclear spin isomers of carbonyl diisothiocyanate
Source: Royal Society of Chemistry journal article supplement (doi:10.1039/d4cp02226b), 2024-01-01
Supplement: d4cp02226b1.pdf [file d4cp02226b1.pdf]

Supplementary Information for the manuscript:

## Rotational Conformers and Nuclear Spin Isomers of Carbonyl Diisothiocyanate

Eva Gougoula<sup>1,\*</sup>, Jonathan Pfeiffer<sup>2</sup>, Melanie Schnell<sup>1,3,\*</sup>, and Frank Tambornino<sup>2,\*</sup>

Affiliations:

<sup>1</sup> Deutsches-Elektronen Synchrotron DESY, Notkestr. 85, 22607 Hamburg, Germany

<sup>2</sup> Fachbereich Chemie, Philipps-Universität Marburg, Hans-Meerwein-Straße 4, 35043 Marburg, Germany

<sup>3</sup> Institut für Physikalische Chemie, Christian-Albrechts-Universität zu Kiel, D-24118 Kiel, Germany

\* Corresponding authors: [melanie.schnell@desy.de](mailto:melanie.schnell@desy.de), [eva.gougoula@desy.de](mailto:eva.gougoula@desy.de), [tamborni@chemie.uni-marburg.de](mailto:tamborni@chemie.uni-marburg.de)

ORCIDs:

Eva Gougoula: <https://orcid.org/0000-0002-2037-1314>

Melanie Schnell: <https://orcid.org/0000-0001-7801-7134>

Frank Tambornino: <https://orcid.org/0000-0003-3538-6049>

**Keywords:** Nuclear Spin Isomers, Chirped-Pulse Fourier Transform Microwave Spectroscopy, Carbonyl Diisothiocyanate, Quantum-Chemical Calculations, Reactive Compounds

## 1. Methods

### 1.1 Experimental Methods

Carbonyl diisothiocyanate (CDIT), a clear and viscous liquid at room temperature, was synthesized according to the procedure described by Pfeiffer and co-workers<sup>1</sup>. In brief, a reaction between phosgene and ammonium isothiocyanate at  $-78\text{ }^{\circ}\text{C}$  under an inert atmosphere (Schlenk technique) yields CDIT. The above conditions allow for isolating and storing CDIT for a sufficiently long time.

The rotational spectrum of CDIT was recorded in the 2-8 and 8-12 GHz frequency ranges using the COMPACT spectrometer in Hamburg<sup>2,3</sup>. The experiment requires that the molecules of interest are in the gas phase. Due to the air and moisture sensitivity of CDIT, the sample was handled under the atmosphere of a glove box ( $\text{O}_2 < 1.2\text{ ppm}$ ,  $\text{H}_2\text{O} < 0.5\text{ ppm}$ ). CDIT was loaded into the reservoir of a modified pulsed valve, which was then assembled and attached to the solenoid. The valve assembly was placed in an airtight container, equilibrated under glove box atmosphere, and transported to the vacuum chamber where it was connected to the neon gas line. The sample was then pressurized by neon at 3 bar stagnation pressure and heated to  $75\text{ }^{\circ}\text{C}$  while pulsed into the vacuum chamber with an 8 Hz repetition rate.

The sequence of events following the incorporation of the gas pulse generating a molecular ensemble is described briefly. A chirped pulse spanning between 2-8 GHz with  $4\text{ }\mu\text{s}$  duration is synthesized by an arbitrary waveform generator (AWG) and amplified by a 300 W traveling wave-tube amplifier. The pulse is broadcast into the vacuum chamber by a horn antenna and excites molecular rotational transitions in resonance with the transmitted frequencies in the fast passage regime. It is noted that the gas pulse and the chirped pulse propagate perpendicular to each other. After the halt of the polarizing pulse, the relaxation of the induced polarization of the molecular ensemble is detected by another horn antenna in the form of a free induction decay (FID) for  $40\text{ }\mu\text{s}$ , followed by digitization and Fourier transformation to the frequency domain spectrum by a 100 GS/s oscilloscope. The spectra in the 8-12 GHz region are recorded following the same principles. However, a chirped pulse between 4-6 GHz is generated, which is then frequency doubled to the desired frequencies and amplified by a 50 W solid state amplifier. For both frequency ranges, the duration of the gas pulse, the timescale of the experiment, and the oscilloscope's fast-frame mode allow for eight sequential polarizations of the molecular ensemble, each followed by a FID recording, which are then co-added in the time domain. With this method, spectra containing 1 and 3.2 million averages were recorded in the 2-8 and 8-12 GHz ranges, respectively.



## 2.1 Quantum Mechanical Calculations

Geometry optimizations of the three possible conformers of CDIT, *syn-syn*, *syn-anti*, and *anti-anti*, were performed with the ORCA 5.0 package<sup>4</sup>. The hybrid functional of Becke-Lee-Yang-Parr (B3LYP)<sup>5</sup> was employed with Grimme's dispersion correction<sup>6-8</sup> (D3BJ) along with the augmented triple- $\zeta$  (aug-cc-pVTZ) basis set<sup>9</sup>. The optimized geometries and calculated molecular parameters are summarized in Table 1. Second-order Møller-Plesset perturbation theory<sup>10</sup> (MP2) and the augmented double- $\zeta$  (aug-cc-pVDZ) basis set<sup>9</sup> was also used to test the performance of the two methods in the spectral analysis. The MP2 calculated parameters are summarized in Table S1 in the Supplementary Material.

Nudged elastic band calculations<sup>11</sup> (NEB) were performed to get an insight into the barriers to interconversion between the three possible conformers. The method of Perdew-Burke-Ernzerhoff<sup>12</sup> (PBEh-3c) was used to optimize the geometry of the CDIT conformers, followed by NEB calculations of the energy barriers to interconversion at the same level of theory. The calculated barriers to interconversion are summarized in Table 1. Visualization of all structures is achieved with the software Chimera 1.16<sup>13</sup>.

## 2. Supporting Tables and Figures

Table S1. A summary of the theoretically calculated rotational constants of *syn-syn*- and *syn-anti*-CDIT at the B3LYP-D3(BJ)/aug-cc-pVTZ and MP2/aug-cc-pVDZ levels of theory. The numbers in brackets indicate the percentage deviation of the theoretical constants from the experimentally determined ones.

| <i>syn-syn</i>  |                              |                 |
|-----------------|------------------------------|-----------------|
|                 | B3LYP-D3(BJ)/aug-cc-pVTZ     | MP2-aug-cc-pVDZ |
| $A_e$ (MHz)     | 10335.6 (-6.4%) <sup>‡</sup> | 10645.8 (-3.6%) |
| $B_e$ (MHz)     | 443.7 (-1.4%)                | 437.8 (-2.7%)   |
| $C_e$ (MHz)     | 425.4 (-1.6%)                | 420.5 (-2.7%)   |
| <i>syn-anti</i> |                              |                 |
|                 | B3LYP-D3(BJ)/aug-cc-pVTZ     | MP2-aug-cc-pVDZ |
| $A_e$ (MHz)     | 2901.6 (-1.4%)               | 2819.4 (-4.1%)  |
| $B_e$ (MHz)     | 612.0 (-2.6%)                | 615.0 (-1.8%)   |
| $C_e$ (MHz)     | 505.4 (-2.3%)                | 504.9 (-2.2%)   |

<sup>‡</sup>The

percentage deviations are calculated by means of the formula: 
$$\sigma = \frac{A_e - A_0}{A_0} \times 100$$
, adapted for each rotational constant.

Table S2. Experimentally determined spectroscopic parameters yielded by Fit 1 and Fit 2 of *syn-syn*-CDIT using Watson's S-reduction as implemented in PGOPHER.

|                                                   | Fit 1 ( <i>para</i> )       | Fit 2 ( <i>ortho</i> )  |
|---------------------------------------------------|-----------------------------|-------------------------|
| $A_0$ (MHz)                                       | 11046.3560(36) <sup>a</sup> | 11046.3586(41)          |
| $B_0$ (MHz)                                       | 449.80163(53)               | 449.80145(53)           |
| $C_0$ (MHz)                                       | 432.27053(70)               | 432.27030(80)           |
| $D_{JK}$ (kHz)                                    | 1.222(39)                   | 1.353(50)               |
| $\chi_{aa}(N_3)$ (MHz)                            | -1.9176(99) <sup>b</sup>    | 1.9240(65) <sup>c</sup> |
| $\chi_{bb}(N_3) - \chi_{cc}(N_3)$ (MHz)           | 0.772(21)                   | -0.756(14) <sup>c</sup> |
| $\chi_{aa}(N_6)$ (MHz)                            | –                           | 1.9240(65) <sup>c</sup> |
| $\chi_{bb}(N_6) - \chi_{cc}(N_6)$ (MHz)           | –                           | -0.756(14) <sup>c</sup> |
| N <sup>c</sup>                                    | 42                          | 50                      |
| $\sigma_{RMS}$ <sup>d</sup> (kHz)                 | 13.0                        | 13.2                    |
| <i>Q</i> -Branch, $\Delta J = 0, \Delta K_a = 1$  | odd <sup>e</sup>            | even                    |
| <i>P</i> -Branch, $\Delta J = -1, \Delta K_a = 1$ | odd                         | even                    |
| <i>R</i> -Branch, $\Delta J = 1, \Delta K_a = 1$  | odd                         | even                    |

<sup>a</sup> Numbers in parentheses are one standard deviation in units of the last significant figures.

<sup>b</sup> The reversed signs of  $\chi_{aa}$  and  $\chi_{bb} - \chi_{cc}$  of Fit 1 when compared to Fit2 arise from the inclusion of only one N nucleus in Fit 1.

<sup>c</sup> The two nitrogen atoms are assumed as equivalent in Fit 2.

<sup>d</sup> Number of hyperfine transitions included in the fit.

<sup>e</sup> Root mean square deviation of the fit.

<sup>f</sup> Odd/even refers to the sum of  $K_a'' + K_c'' = K_{sum}''$

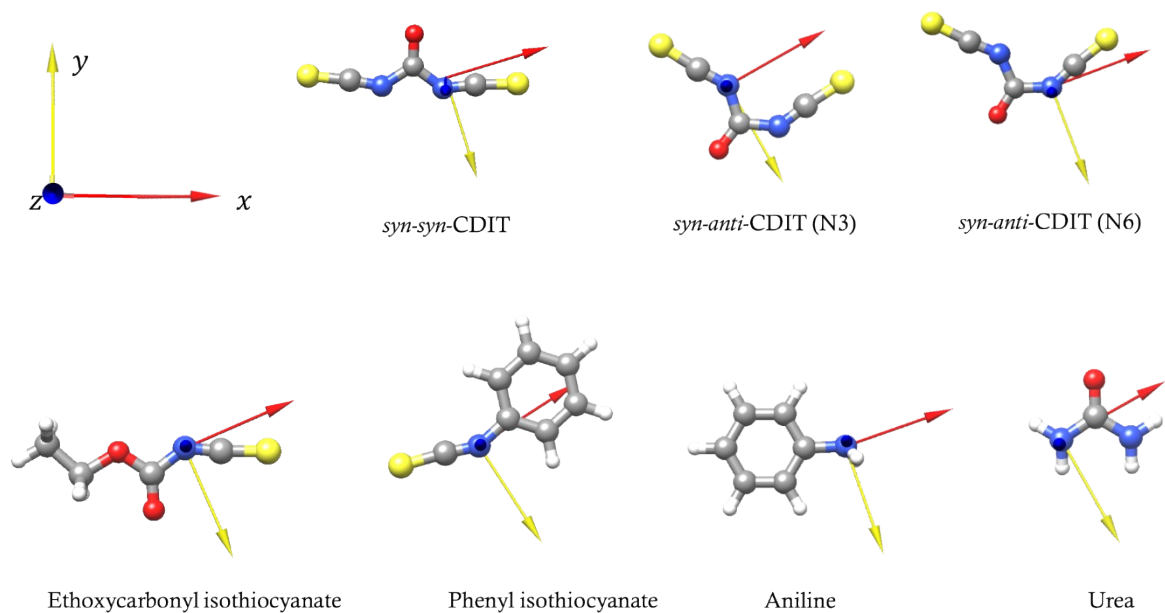

Figure S1. Positioning of the principal nuclear axes  $x$ ,  $y$ ,  $z$  on each N nucleus of the molecules that are included in Table 6 of the manuscript. The axes are orthogonal and follow a common orientation, regardless of the inertial axes of each molecule.

Table S3. Calculated  $r_e$  atomic coordinates of *syn-syn*-CDIT.

| <b><i>syn-syn</i>-CDIT @ B3LYP-D3(BJ)/aug-cc-pVTZ</b> |         |         |         |
|-------------------------------------------------------|---------|---------|---------|
|                                                       | $a$ (Å) | $b$ (Å) | $c$ (Å) |
| O1                                                    | 0       | 1.553   | 0       |
| C2                                                    | 0       | 0.352   | 0       |
| N3                                                    | 1.143   | -0.441  | 0       |
| C4                                                    | 2.337   | -0.264  | 0       |
| S5                                                    | 3.892   | -0.162  | 0       |
| N6                                                    | -1.143  | -0.441  | 0       |
| C7                                                    | -2.337  | -0.264  | 0       |
| S8                                                    | -3.892  | -0.162  | 0       |
| <b><i>syn-syn</i>-CDIT @ MP2/aug-cc-pVDZ</b>          |         |         |         |
|                                                       | $a$ (Å) | $b$ (Å) | $c$ (Å) |
| O1                                                    | 0       | 1.509   | 0       |
| C2                                                    | 0       | 0.292   | 0       |
| N3                                                    | 2.353   | -0.265  | 0       |
| C4                                                    | 1.146   | -0.523  | 0       |
| S5                                                    | 3.919   | -0.104  | 0       |
| N6                                                    | -1.146  | -0.527  | 0       |
| C7                                                    | -2.353  | -0.265  | 0       |
| S8                                                    | -3.919  | -0.104  | 0       |



Table S4. Calculated  $r_e$  atomic coordinates of *syn-anti*-CDIT.

| <b><i>syn-anti</i>-CDIT @ B3LYP-D3(BJ)/aug-cc-pVTZ</b> |         |         |         |
|--------------------------------------------------------|---------|---------|---------|
|                                                        | $a$ (Å) | $b$ (Å) | $c$ (Å) |
| O1                                                     | -0.539  | -2.270  | 0       |
| C2                                                     | -0.018  | -1.192  | 0       |
| N3                                                     | 1.359   | -1.010  | 0       |
| C4                                                     | 2.137   | -0.087  | 0       |
| S5                                                     | 3.235   | 1.019   | 0       |
| N6                                                     | -0.714  | 0.027   | 0       |
| C7                                                     | -1.878  | 0.354   | 0       |
| S8                                                     | -3.339  | 0.895   | 0       |
| <b><i>syn-anti</i>-CDIT @ MP2/aug-cc-pVDZ</b>          |         |         |         |
|                                                        | $a$ (Å) | $b$ (Å) | $c$ (Å) |
| O1                                                     | -0.594  | -2.276  | 0       |
| C2                                                     | -0.019  | -1.207  | 0       |
| N3                                                     | 1.379   | -1.083  | 0       |
| C4                                                     | 2.131   | -0.103  | 0       |
| S5                                                     | 3.216   | 1.037   | 0       |
| N6                                                     | -0.655  | 0.062   | 0       |
| C7                                                     | -1.854  | 0.364   | 0       |
| S8                                                     | -3.332  | 0.904   | 0       |

Table S5. Calculated  $r_e$  atomic coordinates of *anti-anti*-CDIT.

| <b><i>anti-anti</i>-CDIT @ B3LYP-D3(BJ)/aug-cc-pVTZ</b> |         |         |         |
|---------------------------------------------------------|---------|---------|---------|
|                                                         | $a$ (Å) | $b$ (Å) | $c$ (Å) |
| O1                                                      | -0.020  | 2.981   | 0       |
| C2                                                      | -0.016  | 1.786   | 0       |
| N3                                                      | -1.185  | 1.026   | 0       |
| C4                                                      | -1.604  | -0.101  | 0       |
| S5                                                      | -2.266  | -1.516  | 0       |
| N6                                                      | 1.158   | 1.036   | 0       |
| C7                                                      | 1.602   | -0.081  | 0       |
| S8                                                      | 2.295   | -1.481  | 0       |
| <b><i>anti-anti</i>-CDIT @ MP2/aug-cc-pVDZ</b>          |         |         |         |
|                                                         | $a$ (Å) | $b$ (Å) | $c$ (Å) |
| O1                                                      | -0.042  | 3.055   | 0       |
| C2                                                      | -0.026  | 1.844   | 0       |
| N3                                                      | -1.203  | 1.070   | 0       |
| C4                                                      | -1.531  | -0.118  | 0       |
| S5                                                      | -2.127  | -1.579  | 0       |
| N6                                                      | 1.170   | 1.101   | 0       |
| C7                                                      | 1.532   | -0.076  | 0       |
| S8                                                      | 2.17    | -1.519  | 0       |

### 3. List of fits with SPFIT/SPCAT

3.1 *syn-syn*-CDIT ( $I_{N_3} + I_{N_6} = I_{tot}$ , and  $I_{tot} + J = F$ )

PARAMETERS IN FIT (values truncated and Nlines statistics):

|            |                   |                |               |
|------------|-------------------|----------------|---------------|
| 10000      | A / /MHz          | 11046.3581(24) | 1             |
| 20000      | B / /MHz          | 449.80178(41)  | 2             |
| 30000      | C / /MHz          | 432.27083(56)  | 3             |
| 1100       | DJK / /kHz        | 1.281(38)      | 4             |
| 110010000  | 3/2(Xaa) /MHz     | 2.8903(84)     | 5             |
| -220010000 | 3/2(Xaa) /MHz     | 2.8903(84)     | = 1.00000 * 5 |
| 110040000  | 1/4(Xbb-Xcc) /MHz | -0.1856(26)    | 6             |
| -220040000 | 1/4(Xbb-Xcc) /MHz | -0.1856(26)    | = 1.00000 * 6 |

MICROWAVE AVG = -0.000232 MHz, IR AVG = 0.00000

MICROWAVE RMS = 0.013214 MHz, IR RMS = 0.00000

END OF ITERATION 2 OLD, NEW RMS ERROR= 0.88092 0.88092

distinct frequency lines in fit: 116

distinct parameters of fit: 6

|                             | upper state | lower state | overall |
|-----------------------------|-------------|-------------|---------|
| limits of quantum number 1: | 1 17        | 0 16        | 0 17    |
| limits of quantum number 2: | 0 1         | 0 1         | 0 1     |
| limits of quantum number 3: | 0 17        | 0 16        | 0 17    |
| limits of quantum number 4: | 0 2         | 0 2         | 0 2     |
| limits of quantum number 5: | 0 18        | 0 18        | 0 18    |

frequency range: 2357 11847

Linelist L1. *syn-syn*-CDIT

|             | $J''$ | $K_a''$ | $K_c''$ | $I''$ | $F''$ | $J'$ | $K_a'$ | $K_c'$ | $I'$ | $F'$ | $\nu$ (MHz) | $\nu_{obs} - \nu_{calc}$ |
|-------------|-------|---------|---------|-------|-------|------|--------|--------|------|------|-------------|--------------------------|
| <i>para</i> | 8     | 1       | 8       | 1     | 9     | 9    | 0      | 9      | 1    | 10   | 2357.0905   | -0.0078                  |
| <i>para</i> | 8     | 1       | 8       | 1     | 7     | 9    | 0      | 9      | 1    | 8    | 2357.0905   | 0.0025                   |
| <i>para</i> | 8     | 1       | 8       | 1     | 8     | 9    | 0      | 9      | 1    | 9    | 2357.2583   | -0.0002                  |
| <i>orth</i> |       |         |         |       |       |      |        |        |      |      |             |                          |
| <i>o</i>    | 14    | 0       | 14      | 2     | 16    | 13   | 1      | 13     | 2    | 15   | 2509.0840   | 0.0057                   |
| <i>orth</i> |       |         |         |       |       |      |        |        |      |      |             |                          |
| <i>o</i>    | 14    | 0       | 14      | 2     | 14    | 13   | 1      | 13     | 2    | 13   | 2509.3532   | -0.0013                  |
| <i>orth</i> |       |         |         |       |       |      |        |        |      |      |             |                          |
| <i>o</i>    | 7     | 1       | 7       | 2     | 8     | 8    | 0      | 8      | 2    | 8    | 3306.5238   | 0.0041                   |
| <i>orth</i> |       |         |         |       |       |      |        |        |      |      |             |                          |
| <i>o</i>    | 7     | 1       | 7       | 2     | 9     | 8    | 0      | 8      | 2    | 9    | 3306.5238   | -0.0149                  |
| <i>orth</i> |       |         |         |       |       |      |        |        |      |      |             |                          |
| <i>o</i>    | 7     | 1       | 7       | 2     | 7     | 8    | 0      | 8      | 2    | 8    | 3306.9559   | -0.0018                  |
| <i>orth</i> |       |         |         |       |       |      |        |        |      |      |             |                          |
| <i>o</i>    | 7     | 1       | 7       | 2     | 8     | 8    | 0      | 8      | 2    | 9    | 3307.0910   | -0.0236                  |
| <i>orth</i> |       |         |         |       |       |      |        |        |      |      |             |                          |
| <i>o</i>    | 7     | 1       | 7       | 2     | 6     | 8    | 0      | 8      | 2    | 7    | 3307.0910   | -0.0593                  |
| <i>orth</i> |       |         |         |       |       |      |        |        |      |      |             |                          |
| <i>o</i>    | 7     | 1       | 7       | 2     | 9     | 8    | 0      | 8      | 2    | 10   | 3307.3019   | 0.0068                   |
| <i>orth</i> |       |         |         |       |       |      |        |        |      |      |             |                          |
| <i>o</i>    | 7     | 1       | 7       | 0     | 7     | 8    | 0      | 8      | 0    | 8    | 3307.3019   | -0.0050                  |
| <i>orth</i> |       |         |         |       |       |      |        |        |      |      |             |                          |
| <i>o</i>    | 7     | 1       | 7       | 2     | 5     | 8    | 0      | 8      | 2    | 6    | 3307.3019   | -0.0170                  |
| <i>para</i> | 15    | 0       | 15      | 1     | 15    | 14   | 1      | 14     | 1    | 14   | 3504.1449   | -0.0027                  |
| <i>para</i> | 15    | 0       | 15      | 1     | 16    | 14   | 1      | 14     | 1    | 15   | 3504.2813   | -0.0019                  |
| <i>para</i> | 15    | 0       | 15      | 1     | 14    | 14   | 1      | 14     | 1    | 13   | 3504.2813   | -0.0083                  |
| <i>para</i> | 6     | 1       | 6       | 1     | 7     | 7    | 0      | 7      | 1    | 8    | 4249.0362   | -0.0059                  |
| <i>para</i> | 6     | 1       | 6       | 1     | 5     | 7    | 0      | 7      | 1    | 6    | 4249.0362   | 0.0079                   |
| <i>para</i> | 6     | 1       | 6       | 1     | 6     | 7    | 0      | 7      | 1    | 7    | 4249.2236   | 0.0001                   |
| <i>orth</i> |       |         |         |       |       |      |        |        |      |      |             |                          |
| <i>o</i>    | 16    | 0       | 16      | 2     | 18    | 15   | 1      | 15     | 2    | 17   | 4505.9554   | 0.0006                   |
| <i>orth</i> |       |         |         |       |       |      |        |        |      |      |             |                          |
| <i>o</i>    | 16    | 0       | 16      | 0     | 16    | 15   | 1      | 15     | 0    | 15   | 4505.9554   | 0.0066                   |
| <i>orth</i> |       |         |         |       |       |      |        |        |      |      |             |                          |
| <i>o</i>    | 16    | 0       | 16      | 2     | 14    | 15   | 1      | 15     | 2    | 13   | 4505.9554   | 0.0126                   |

|             | $J''$ | $K''_a$ | $K''_c$ | $I''$ | $F''$ | $J'$ | $K'_a$ | $K'_c$ | $I'$ | $F'$ | (MHz)     | $\nu_{obs} - \nu_{calc}$ |
|-------------|-------|---------|---------|-------|-------|------|--------|--------|------|------|-----------|--------------------------|
| <i>orth</i> |       |         |         |       |       |      |        |        |      |      |           |                          |
| <i>o</i>    | 16    | 0       | 16      | 2     | 16    | 15   | 1      | 15     | 2    | 15   | 4506.1948 | -0.0259                  |
| <i>orth</i> |       |         |         |       |       |      |        |        |      |      |           |                          |
| <i>o</i>    | 5     | 1       | 5       | 2     | 7     | 6    | 0      | 6      | 2    | 7    | 5182.0838 | -0.0052                  |
| <i>orth</i> |       |         |         |       |       |      |        |        |      |      |           |                          |
| <i>o</i>    | 5     | 1       | 5       | 2     | 5     | 6    | 0      | 6      | 2    | 6    | 5182.4594 | 0.0034                   |
| <i>orth</i> |       |         |         |       |       |      |        |        |      |      |           |                          |
| <i>o</i>    | 5     | 1       | 5       | 2     | 4     | 6    | 0      | 6      | 2    | 5    | 5182.6626 | -0.0289                  |
| <i>orth</i> |       |         |         |       |       |      |        |        |      |      |           |                          |
| <i>o</i>    | 5     | 1       | 5       | 2     | 6     | 6    | 0      | 6      | 2    | 7    | 5182.6626 | 0.0234                   |
| <i>orth</i> |       |         |         |       |       |      |        |        |      |      |           |                          |
| <i>o</i>    | 5     | 1       | 5       | 2     | 3     | 6    | 0      | 6      | 2    | 4    | 5182.8604 | -0.0319                  |
| <i>orth</i> |       |         |         |       |       |      |        |        |      |      |           |                          |
| <i>o</i>    | 5     | 1       | 5       | 0     | 5     | 6    | 0      | 6      | 0    | 6    | 5182.8604 | -0.0143                  |
| <i>orth</i> |       |         |         |       |       |      |        |        |      |      |           |                          |
| <i>o</i>    | 5     | 1       | 5       | 2     | 7     | 6    | 0      | 6      | 2    | 8    | 5182.8604 | 0.0030                   |
| <i>orth</i> |       |         |         |       |       |      |        |        |      |      |           |                          |
| <i>o</i>    | 5     | 1       | 5       | 2     | 5     | 6    | 0      | 6      | 2    | 5    | 5183.3455 | -0.0098                  |
| <i>orth</i> |       |         |         |       |       |      |        |        |      |      |           |                          |
| <i>o</i>    | 5     | 1       | 5       | 2     | 4     | 6    | 0      | 6      | 2    | 4    | 5183.3455 | -0.0007                  |
| <i>orth</i> |       |         |         |       |       |      |        |        |      |      |           |                          |
| <i>o</i>    | 5     | 1       | 5       | 2     | 6     | 6    | 0      | 6      | 0    | 6    | 5183.5171 | -0.0039                  |
| <i>para</i> | 17    | 0       | 17      | 1     | 18    | 16   | 1      | 16     | 1    | 17   | 5514.3537 | 0.0122                   |
| <i>para</i> | 17    | 0       | 17      | 1     | 16    | 16   | 1      | 16     | 1    | 15   | 5514.3537 | 0.0066                   |
| <i>para</i> | 4     | 1       | 4       | 1     | 5     | 5    | 0      | 5      | 1    | 6    | 6107.9157 | 0.0033                   |
| <i>para</i> | 4     | 1       | 4       | 1     | 3     | 5    | 0      | 5      | 1    | 4    | 6107.9157 | 0.0278                   |
| <i>para</i> | 4     | 1       | 4       | 1     | 4     | 5    | 0      | 5      | 1    | 5    | 6108.1534 | 0.0070                   |
| <i>orth</i> |       |         |         |       |       |      |        |        |      |      |           |                          |
| <i>o</i>    | 3     | 1       | 3       | 2     | 3     | 4    | 0      | 4      | 2    | 4    | 7024.3186 | 0.0058                   |
| <i>orth</i> |       |         |         |       |       |      |        |        |      |      |           |                          |
| <i>o</i>    | 3     | 1       | 3       | 2     | 4     | 4    | 0      | 4      | 2    | 5    | 7024.5712 | 0.0043                   |
| <i>orth</i> |       |         |         |       |       |      |        |        |      |      |           |                          |
| <i>o</i>    | 3     | 1       | 3       | 2     | 2     | 4    | 0      | 4      | 2    | 3    | 7024.7011 | 0.0037                   |
| <i>orth</i> |       |         |         |       |       |      |        |        |      |      |           |                          |
| <i>o</i>    | 3     | 1       | 3       | 0     | 3     | 4    | 0      | 4      | 0    | 4    | 7024.8967 | -0.0527                  |
| <i>orth</i> |       |         |         |       |       |      |        |        |      |      |           |                          |
| <i>o</i>    | 3     | 1       | 3       | 2     | 5     | 4    | 0      | 4      | 2    | 6    | 7024.8967 | -0.0097                  |

|             | $J''$ | $K''_a$ | $K''_c$ | $I''$ | $F''$ | $J'$ | $K'_a$ | $K'_c$ | $I'$ | $F'$ | (MHz)      | $\nu_{obs} - \nu_{calc}$ |
|-------------|-------|---------|---------|-------|-------|------|--------|--------|------|------|------------|--------------------------|
| <i>o</i>    |       |         |         |       |       |      |        |        |      |      |            |                          |
| <i>orth</i> |       |         |         |       |       |      |        |        |      |      |            |                          |
| <i>o</i>    | 3     | 1       | 3       | 2     | 3     | 4    | 0      | 4      | 2    | 3    | 7025.3167  | 0.0097                   |
| <i>orth</i> |       |         |         |       |       |      |        |        |      |      |            |                          |
| <i>o</i>    | 3     | 1       | 3       | 2     | 4     | 4    | 0      | 4      | 0    | 4    | 7025.5289  | 0.0054                   |
| <i>para</i> | 2     | 1       | 2       | 1     | 2     | 3    | 0      | 3      | 1    | 2    | 7932.3855  | 0.0100                   |
| <i>para</i> | 2     | 1       | 2       | 1     | 1     | 3    | 0      | 3      | 1    | 2    | 7932.6771  | 0.0052                   |
| <i>para</i> | 2     | 1       | 2       | 1     | 3     | 3    | 0      | 3      | 1    | 4    | 7932.8022  | 0.0118                   |
| <i>para</i> | 2     | 1       | 2       | 1     | 2     | 3    | 0      | 3      | 1    | 3    | 7933.2517  | 0.0097                   |
| <i>para</i> | 2     | 1       | 2       | 1     | 3     | 3    | 0      | 3      | 1    | 3    | 7933.4420  | 0.0098                   |
| <i>orth</i> |       |         |         |       |       |      |        |        |      |      |            |                          |
| <i>o</i>    | 1     | 1       | 1       | 0     | 1     | 2    | 0      | 2      | 2    | 2    | 8831.1725  | -0.0112                  |
| <i>orth</i> |       |         |         |       |       |      |        |        |      |      |            |                          |
| <i>o</i>    | 1     | 1       | 1       | 2     | 2     | 2    | 0      | 2      | 2    | 2    | 8831.1725  | 0.0481                   |
| <i>orth</i> |       |         |         |       |       |      |        |        |      |      |            |                          |
| <i>o</i>    | 1     | 1       | 1       | 2     | 2     | 2    | 0      | 2      | 2    | 3    | 8831.4185  | 0.0059                   |
| <i>orth</i> |       |         |         |       |       |      |        |        |      |      |            |                          |
| <i>o</i>    | 1     | 1       | 1       | 2     | 3     | 2    | 0      | 2      | 2    | 3    | 8832.0166  | 0.0034                   |
| <i>orth</i> |       |         |         |       |       |      |        |        |      |      |            |                          |
| <i>o</i>    | 1     | 1       | 1       | 0     | 1     | 2    | 0      | 2      | 2    | 1    | 8832.4680  | -0.0358                  |
| <i>orth</i> |       |         |         |       |       |      |        |        |      |      |            |                          |
| <i>o</i>    | 1     | 1       | 1       | 2     | 2     | 2    | 0      | 2      | 2    | 1    | 8832.4680  | 0.0236                   |
| <i>orth</i> |       |         |         |       |       |      |        |        |      |      |            |                          |
| <i>o</i>    | 1     | 1       | 1       | 2     | 2     | 2    | 0      | 2      | 0    | 2    | 8832.6237  | 0.0289                   |
| <i>orth</i> |       |         |         |       |       |      |        |        |      |      |            |                          |
| <i>o</i>    | 1     | 1       | 1       | 0     | 1     | 2    | 0      | 2      | 0    | 2    | 8832.6237  | -0.0304                  |
| <i>orth</i> |       |         |         |       |       |      |        |        |      |      |            |                          |
| <i>o</i>    | 1     | 1       | 1       | 2     | 3     | 2    | 0      | 2      | 2    | 4    | 8832.8413  | 0.0024                   |
| <i>orth</i> |       |         |         |       |       |      |        |        |      |      |            |                          |
| <i>o</i>    | 1     | 1       | 1       | 2     | 1     | 2    | 0      | 2      | 2    | 1    | 8833.7897  | 0.0033                   |
| <i>orth</i> |       |         |         |       |       |      |        |        |      |      |            |                          |
| <i>o</i>    | 1     | 1       | 1       | 2     | 1     | 2    | 0      | 2      | 0    | 2    | 8833.9383  | 0.0016                   |
| <i>orth</i> |       |         |         |       |       |      |        |        |      |      |            |                          |
| <i>o</i>    | 1     | 1       | 1       | 2     | 1     | 2    | 0      | 2      | 2    | 0    | 8834.2689  | 0.0017                   |
| <i>para</i> | 1     | 1       | 0       | 1     | 1     | 1    | 0      | 1      | 1    | 0    | 10613.2682 | -0.0007                  |
| <i>para</i> | 1     | 1       | 0       | 1     | 2     | 1    | 0      | 1      | 1    | 2    | 10613.9585 | -0.0003                  |

|             | $J''$ | $K''_a$ | $K''_c$ | $I''$ | $F''$ | $J'$ | $K'_a$ | $K'_c$ | $I'$ | $F'$ | (MHz)      | $\nu_{obs} - \nu_{calc}$ |
|-------------|-------|---------|---------|-------|-------|------|--------|--------|------|------|------------|--------------------------|
| <i>para</i> | 1     | 1       | 0       | 1     | 1     | 1    | 0      | 1      | 1    | 2    | 10614.1329 | -0.0032                  |
| <i>para</i> | 1     | 1       | 0       | 1     | 0     | 1    | 0      | 1      | 1    | 1    | 10614.2609 | -0.0095                  |
| <i>para</i> | 1     | 1       | 0       | 1     | 2     | 1    | 0      | 1      | 1    | 1    | 10614.5359 | -0.0008                  |
| <i>para</i> | 1     | 1       | 0       | 1     | 1     | 1    | 0      | 1      | 1    | 1    | 10614.7113 | -0.0028                  |
| <i>orth</i> |       |         |         |       |       |      |        |        |      |      |            |                          |
| <i>o</i>    | 2     | 1       | 1       | 0     | 2     | 2    | 0      | 2      | 2    | 2    | 10630.3586 | 0.0025                   |
| <i>orth</i> |       |         |         |       |       |      |        |        |      |      |            |                          |
| <i>o</i>    | 2     | 1       | 1       | 2     | 1     | 2    | 0      | 2      | 2    | 2    | 10630.4648 | 0.0041                   |
| <i>orth</i> |       |         |         |       |       |      |        |        |      |      |            |                          |
| <i>o</i>    | 2     | 1       | 1       | 0     | 2     | 2    | 0      | 2      | 2    | 3    | 10630.6460 | 0.0016                   |
| <i>orth</i> |       |         |         |       |       |      |        |        |      |      |            |                          |
| <i>o</i>    | 2     | 1       | 1       | 2     | 4     | 2    | 0      | 2      | 2    | 3    | 10630.8931 | 0.0019                   |
| <i>orth</i> |       |         |         |       |       |      |        |        |      |      |            |                          |
| <i>o</i>    | 2     | 1       | 1       | 2     | 3     | 2    | 0      | 2      | 2    | 2    | 10631.1753 | 0.0002                   |
| <i>orth</i> |       |         |         |       |       |      |        |        |      |      |            |                          |
| <i>o</i>    | 2     | 1       | 1       | 2     | 3     | 2    | 0      | 2      | 2    | 3    | 10631.4341 | -0.0291                  |
| <i>orth</i> |       |         |         |       |       |      |        |        |      |      |            |                          |
| <i>o</i>    | 2     | 1       | 1       | 2     | 0     | 2    | 0      | 2      | 2    | 1    | 10631.4341 | -0.0124                  |
| <i>orth</i> |       |         |         |       |       |      |        |        |      |      |            |                          |
| <i>o</i>    | 2     | 1       | 1       | 2     | 2     | 2    | 0      | 2      | 2    | 2    | 10631.4341 | 0.0596                   |
| <i>orth</i> |       |         |         |       |       |      |        |        |      |      |            |                          |
| <i>o</i>    | 2     | 1       | 1       | 2     | 4     | 2    | 0      | 2      | 2    | 4    | 10631.7142 | -0.0026                  |
| <i>orth</i> |       |         |         |       |       |      |        |        |      |      |            |                          |
| <i>o</i>    | 2     | 1       | 1       | 0     | 2     | 2    | 0      | 2      | 2    | 1    | 10631.7142 | 0.0380                   |
| <i>orth</i> |       |         |         |       |       |      |        |        |      |      |            |                          |
| <i>o</i>    | 2     | 1       | 1       | 2     | 2     | 2    | 0      | 2      | 2    | 3    | 10631.7142 | 0.0514                   |
| <i>orth</i> |       |         |         |       |       |      |        |        |      |      |            |                          |
| <i>o</i>    | 2     | 1       | 1       | 0     | 2     | 2    | 0      | 2      | 0    | 2    | 10631.8188 | -0.0076                  |
| <i>orth</i> |       |         |         |       |       |      |        |        |      |      |            |                          |
| <i>o</i>    | 2     | 1       | 1       | 2     | 1     | 2    | 0      | 2      | 0    | 2    | 10631.9591 | 0.0279                   |
| <i>orth</i> |       |         |         |       |       |      |        |        |      |      |            |                          |
| <i>o</i>    | 2     | 1       | 1       | 2     | 3     | 2    | 0      | 2      | 2    | 4    | 10632.2876 | -0.0013                  |
| <i>orth</i> |       |         |         |       |       |      |        |        |      |      |            |                          |
| <i>o</i>    | 2     | 1       | 1       | 2     | 1     | 2    | 0      | 2      | 2    | 0    | 10632.2876 | 0.0260                   |
| <i>orth</i> |       |         |         |       |       |      |        |        |      |      |            |                          |
| <i>o</i>    | 2     | 1       | 1       | 2     | 2     | 2    | 0      | 2      | 2    | 1    | 10632.6919 | -0.0026                  |

|             | $J''$ | $K''_a$ | $K''_c$ | $I''$ | $F''$ | $J'$ | $K'_a$ | $K'_c$ | $I'$ | $F'$ | (MHz)      | $\nu_{obs} - \nu_{calc}$ |
|-------------|-------|---------|---------|-------|-------|------|--------|--------|------|------|------------|--------------------------|
| <i>orth</i> |       |         |         |       |       |      |        |        |      |      |            |                          |
| <i>o</i>    | 2     | 1       | 1       | 2     | 3     | 2    | 0      | 2      | 0    | 2    | 10632.6919 | 0.0464                   |
| <i>orth</i> |       |         |         |       |       |      |        |        |      |      |            |                          |
| <i>o</i>    | 2     | 1       | 1       | 2     | 2     | 2    | 0      | 2      | 0    | 2    | 10632.8336 | -0.0113                  |
| <i>para</i> | 3     | 1       | 2       | 1     | 3     | 3    | 0      | 3      | 1    | 2    | 10657.1508 | -0.0043                  |
| <i>para</i> | 3     | 1       | 2       | 1     | 3     | 3    | 0      | 3      | 1    | 4    | 10657.3730 | -0.0069                  |
| <i>para</i> | 3     | 1       | 2       | 1     | 2     | 3    | 0      | 3      | 1    | 2    | 10657.9545 | -0.0181                  |
| <i>para</i> | 3     | 1       | 2       | 1     | 4     | 3    | 0      | 3      | 1    | 4    | 10657.9545 | -0.0308                  |
| <i>para</i> | 3     | 1       | 2       | 1     | 3     | 3    | 0      | 3      | 1    | 3    | 10657.9545 | -0.0672                  |
| <i>para</i> | 3     | 1       | 2       | 1     | 4     | 3    | 0      | 3      | 1    | 3    | 10658.6183 | -0.0087                  |
| <i>para</i> | 3     | 1       | 2       | 1     | 2     | 3    | 0      | 3      | 1    | 3    | 10658.8305 | -0.0085                  |
| <i>orth</i> |       |         |         |       |       |      |        |        |      |      |            |                          |
| <i>o</i>    | 4     | 1       | 3       | 0     | 4     | 4    | 0      | 4      | 2    | 5    | 10692.2249 | -0.0154                  |
| <i>orth</i> |       |         |         |       |       |      |        |        |      |      |            |                          |
| <i>o</i>    | 4     | 1       | 3       | 2     | 3     | 4    | 0      | 4      | 2    | 4    | 10692.2249 | 0.0022                   |
| <i>orth</i> |       |         |         |       |       |      |        |        |      |      |            |                          |
| <i>o</i>    | 4     | 1       | 3       | 2     | 6     | 4    | 0      | 4      | 2    | 5    | 10692.4247 | 0.0073                   |
| <i>orth</i> |       |         |         |       |       |      |        |        |      |      |            |                          |
| <i>o</i>    | 4     | 1       | 3       | 2     | 2     | 4    | 0      | 4      | 2    | 3    | 10692.5626 | -0.0087                  |
| <i>orth</i> |       |         |         |       |       |      |        |        |      |      |            |                          |
| <i>o</i>    | 4     | 1       | 3       | 2     | 5     | 4    | 0      | 4      | 2    | 4    | 10692.7467 | -0.0040                  |
| <i>orth</i> |       |         |         |       |       |      |        |        |      |      |            |                          |
| <i>o</i>    | 4     | 1       | 3       | 2     | 3     | 4    | 0      | 4      | 2    | 3    | 10693.1881 | -0.0288                  |
| <i>orth</i> |       |         |         |       |       |      |        |        |      |      |            |                          |
| <i>o</i>    | 4     | 1       | 3       | 2     | 2     | 4    | 0      | 4      | 2    | 2    | 10693.1883 | -0.0014                  |
| <i>orth</i> |       |         |         |       |       |      |        |        |      |      |            |                          |
| <i>o</i>    | 4     | 1       | 3       | 0     | 4     | 4    | 0      | 4      | 0    | 4    | 10693.1883 | -0.0088                  |
| <i>orth</i> |       |         |         |       |       |      |        |        |      |      |            |                          |
| <i>o</i>    | 4     | 1       | 3       | 2     | 6     | 4    | 0      | 4      | 2    | 6    | 10693.1883 | -0.0162                  |
| <i>orth</i> |       |         |         |       |       |      |        |        |      |      |            |                          |
| <i>o</i>    | 4     | 1       | 3       | 2     | 3     | 4    | 0      | 4      | 2    | 2    | 10693.7849 | -0.0503                  |
| <i>orth</i> |       |         |         |       |       |      |        |        |      |      |            |                          |
| <i>o</i>    | 4     | 1       | 3       | 2     | 4     | 4    | 0      | 4      | 2    | 5    | 10693.7849 | 0.0361                   |
| <i>orth</i> |       |         |         |       |       |      |        |        |      |      |            |                          |
| <i>o</i>    | 4     | 1       | 3       | 2     | 3     | 4    | 0      | 4      | 0    | 4    | 10693.7849 | 0.1172                   |
| <i>orth</i> |       |         |         |       |       |      |        |        |      |      |            |                          |
| <i>o</i>    | 4     | 1       | 3       | 2     | 5     | 4    | 0      | 4      | 2    | 6    | 10694.0262 | 0.0000                   |



|             | $J''$ | $K''_a$ | $K''_c$ | $I''$ | $F''$ | $J'$ | $K'_a$ | $K'_c$ | $I'$ | $F'$ | (MHz)      | $\nu_{obs} - \nu_{calc}$ |
|-------------|-------|---------|---------|-------|-------|------|--------|--------|------|------|------------|--------------------------|
| <i>o</i>    |       |         |         |       |       |      |        |        |      |      |            |                          |
| <i>orth</i> |       |         |         |       |       |      |        |        |      |      |            |                          |
| <i>o</i>    | 4     | 1       | 3       | 2     | 5     | 4    | 0      | 4      | 0    | 4    | 10694.2403 | 0.0445                   |
| <i>orth</i> |       |         |         |       |       |      |        |        |      |      |            |                          |
| <i>o</i>    | 4     | 1       | 3       | 2     | 4     | 4    | 0      | 4      | 2    | 3    | 10694.2403 | -0.0143                  |
| <i>para</i> | 5     | 1       | 4       | 1     | 5     | 5    | 0      | 5      | 1    | 4    | 10736.5237 | -0.0035                  |
| <i>para</i> | 5     | 1       | 4       | 1     | 5     | 5    | 0      | 5      | 1    | 6    | 10736.6564 | -0.0065                  |
| <i>para</i> | 5     | 1       | 4       | 1     | 5     | 5    | 0      | 5      | 1    | 5    | 10737.3746 | 0.0462                   |
| <i>para</i> | 5     | 1       | 4       | 1     | 6     | 5    | 0      | 5      | 1    | 6    | 10737.3746 | -0.0168                  |
| <i>para</i> | 5     | 1       | 4       | 1     | 4     | 5    | 0      | 5      | 1    | 4    | 10737.3746 | -0.0296                  |
| <i>para</i> | 5     | 1       | 4       | 1     | 6     | 5    | 0      | 5      | 1    | 5    | 10738.0682 | 0.0113                   |
| <i>para</i> | 5     | 1       | 4       | 1     | 4     | 5    | 0      | 5      | 1    | 5    | 10738.1929 | -0.0124                  |
| <i>orth</i> |       |         |         |       |       |      |        |        |      |      |            |                          |
| <i>o</i>    | 6     | 1       | 5       | 2     | 5     | 6    | 0      | 6      | 2    | 6    | 10789.7150 | 0.0712                   |
| <i>orth</i> |       |         |         |       |       |      |        |        |      |      |            |                          |
| <i>o</i>    | 6     | 1       | 5       | 2     | 8     | 6    | 0      | 6      | 2    | 7    | 10789.7150 | -0.0066                  |
| <i>orth</i> |       |         |         |       |       |      |        |        |      |      |            |                          |
| <i>o</i>    | 6     | 1       | 5       | 2     | 7     | 6    | 0      | 6      | 2    | 6    | 10790.0055 | -0.0208                  |
| <i>orth</i> |       |         |         |       |       |      |        |        |      |      |            |                          |
| <i>o</i>    | 6     | 1       | 5       | 2     | 8     | 6    | 0      | 6      | 2    | 8    | 10790.4700 | -0.0200                  |
| <i>orth</i> |       |         |         |       |       |      |        |        |      |      |            |                          |
| <i>o</i>    | 6     | 1       | 5       | 0     | 6     | 6    | 0      | 6      | 0    | 6    | 10790.4700 | -0.0058                  |
| <i>orth</i> |       |         |         |       |       |      |        |        |      |      |            |                          |
| <i>o</i>    | 6     | 1       | 5       | 2     | 4     | 6    | 0      | 6      | 2    | 4    | 10790.4700 | 0.0081                   |
| <i>orth</i> |       |         |         |       |       |      |        |        |      |      |            |                          |
| <i>o</i>    | 6     | 1       | 5       | 2     | 6     | 6    | 0      | 6      | 2    | 6    | 10790.6237 | -0.0310                  |
| <i>orth</i> |       |         |         |       |       |      |        |        |      |      |            |                          |
| <i>o</i>    | 6     | 1       | 5       | 2     | 7     | 6    | 0      | 6      | 2    | 7    | 10790.6237 | 0.0383                   |
| <i>orth</i> |       |         |         |       |       |      |        |        |      |      |            |                          |
| <i>o</i>    | 6     | 1       | 5       | 2     | 5     | 6    | 0      | 6      | 0    | 6    | 10791.0611 | -0.0234                  |
| <i>orth</i> |       |         |         |       |       |      |        |        |      |      |            |                          |
| <i>o</i>    | 6     | 1       | 5       | 2     | 6     | 6    | 0      | 6      | 2    | 7    | 10791.2064 | -0.0073                  |
| <i>orth</i> |       |         |         |       |       |      |        |        |      |      |            |                          |
| <i>o</i>    | 6     | 1       | 5       | 2     | 5     | 6    | 0      | 6      | 2    | 4    | 10791.2064 | 0.0086                   |
| <i>orth</i> |       |         |         |       |       |      |        |        |      |      |            |                          |
| <i>o</i>    | 6     | 1       | 5       | 2     | 7     | 6    | 0      | 6      | 0    | 6    | 10791.5301 | 0.0628                   |

|             | $J''$ | $K''_a$ | $K''_c$ | $I''$ | $F''$ | $J'$ | $K'_a$ | $K'_c$ | $I'$ | $F'$ | (MHz)      | $\nu_{obs} - \nu_{calc}$ |
|-------------|-------|---------|---------|-------|-------|------|--------|--------|------|------|------------|--------------------------|
| <i>orth</i> |       |         |         |       |       |      |        |        |      |      |            |                          |
| <i>o</i>    | 6     | 1       | 5       | 2     | 6     | 6    | 0      | 6      | 2    | 5    | 10791.5301 | -0.0240                  |
| <i>para</i> | 7     | 1       | 6       | 1     | 7     | 7    | 0      | 7      | 1    | 7    | 10852.7560 | 0.0158                   |
| <i>para</i> | 7     | 1       | 6       | 1     | 8     | 7    | 0      | 7      | 1    | 8    | 10852.8481 | 0.0110                   |
| <i>para</i> | 7     | 1       | 6       | 1     | 6     | 7    | 0      | 7      | 1    | 6    | 10852.8481 | -0.0029                  |
| <i>orth</i> |       |         |         |       |       |      |        |        |      |      |            |                          |
| <i>o</i>    | 8     | 1       | 7       | 2     | 7     | 8    | 0      | 8      | 2    | 8    | 10923.4792 | 0.0157                   |
| <i>orth</i> |       |         |         |       |       |      |        |        |      |      |            |                          |
| <i>o</i>    | 8     | 1       | 7       | 2     | 10    | 8    | 0      | 8      | 2    | 9    | 10923.4792 | -0.0020                  |
| <i>orth</i> |       |         |         |       |       |      |        |        |      |      |            |                          |
| <i>o</i>    | 8     | 1       | 7       | 2     | 10    | 8    | 0      | 8      | 2    | 10   | 10924.2309 | -0.0067                  |
| <i>orth</i> |       |         |         |       |       |      |        |        |      |      |            |                          |
| <i>o</i>    | 8     | 1       | 7       | 0     | 8     | 8    | 0      | 8      | 0    | 8    | 10924.2309 | 0.0067                   |
| <i>orth</i> |       |         |         |       |       |      |        |        |      |      |            |                          |
| <i>o</i>    | 8     | 1       | 7       | 2     | 6     | 8    | 0      | 8      | 2    | 6    | 10924.2309 | 0.0200                   |
| <i>orth</i> |       |         |         |       |       |      |        |        |      |      |            |                          |
| <i>o</i>    | 8     | 1       | 7       | 2     | 8     | 8    | 0      | 8      | 2    | 8    | 10924.4307 | -0.0179                  |
| <i>orth</i> |       |         |         |       |       |      |        |        |      |      |            |                          |
| <i>o</i>    | 8     | 1       | 7       | 2     | 9     | 8    | 0      | 8      | 2    | 9    | 10924.4307 | 0.0749                   |
| <i>orth</i> |       |         |         |       |       |      |        |        |      |      |            |                          |
| <i>o</i>    | 8     | 1       | 7       | 2     | 8     | 8    | 0      | 8      | 2    | 7    | 10925.3010 | 0.0001                   |
| <i>para</i> | 9     | 1       | 8       | 1     | 9     | 9    | 0      | 9      | 1    | 9    | 11005.0958 | 0.0322                   |
| <i>para</i> | 9     | 1       | 8       | 1     | 10    | 9    | 0      | 9      | 1    | 10   | 11005.2084 | 0.0314                   |
| <i>para</i> | 9     | 1       | 8       | 1     | 8     | 9    | 0      | 9      | 1    | 8    | 11005.2084 | 0.0188                   |
| <i>orth</i> |       |         |         |       |       |      |        |        |      |      |            |                          |
| <i>o</i>    | 10    | 1       | 9       | 2     | 12    | 10   | 0      | 10     | 2    | 12   | 11095.3965 | -0.0122                  |
| <i>orth</i> |       |         |         |       |       |      |        |        |      |      |            |                          |
| <i>o</i>    | 10    | 1       | 9       | 0     | 10    | 10   | 0      | 10     | 0    | 10   | 11095.3965 | -0.0003                  |
| <i>orth</i> |       |         |         |       |       |      |        |        |      |      |            |                          |
| <i>o</i>    | 10    | 1       | 9       | 2     | 8     | 10   | 0      | 10     | 2    | 8    | 11095.3965 | 0.0116                   |
| <i>orth</i> |       |         |         |       |       |      |        |        |      |      |            |                          |
| <i>o</i>    | 10    | 1       | 9       | 2     | 10    | 10   | 0      | 10     | 2    | 10   | 11095.6485 | 0.0031                   |
| <i>para</i> | 11    | 1       | 10      | 1     | 11    | 11   | 0      | 11     | 1    | 11   | 11195.3669 | -0.0229                  |
| <i>para</i> | 11    | 1       | 10      | 1     | 12    | 11   | 0      | 11     | 1    | 12   | 11195.5196 | 0.0064                   |
| <i>para</i> | 11    | 1       | 10      | 1     | 10    | 11   | 0      | 11     | 1    | 10   | 11195.5196 | -0.0048                  |
| <i>orth</i> | 12    | 1       | 11      | 2     | 14    | 12   | 0      | 12     | 2    | 14   | 11305.1829 | -0.0423                  |

|             | $J''$ | $K''_a$ | $K''_c$ | $I''$ | $F''$ | $J'$ | $K'_a$ | $K'_c$ | $I'$ | $F'$ | (MHz)      | $\nu_{obs} - \nu_{calc}$ |
|-------------|-------|---------|---------|-------|-------|------|--------|--------|------|------|------------|--------------------------|
| <i>o</i>    |       |         |         |       |       |      |        |        |      |      |            |                          |
| <i>orth</i> |       |         |         |       |       |      |        |        |      |      |            |                          |
| <i>o</i>    | 12    | 1       | 11      | 0     | 12    | 12   | 0      | 12     | 0    | 12   | 11305.1829 | -0.0316                  |
| <i>orth</i> |       |         |         |       |       |      |        |        |      |      |            |                          |
| <i>o</i>    | 12    | 1       | 11      | 2     | 10    | 12   | 0      | 12     | 2    | 10   | 11305.1829 | -0.0210                  |
| <i>orth</i> |       |         |         |       |       |      |        |        |      |      |            |                          |
| <i>o</i>    | 12    | 1       | 11      | 2     | 13    | 12   | 0      | 12     | 2    | 13   | 11305.3097 | -0.0524                  |
| <i>orth</i> |       |         |         |       |       |      |        |        |      |      |            |                          |
| <i>o</i>    | 12    | 1       | 11      | 2     | 11    | 12   | 0      | 12     | 2    | 11   | 11305.3097 | -0.0205                  |
| <i>orth</i> |       |         |         |       |       |      |        |        |      |      |            |                          |
| <i>o</i>    | 12    | 1       | 11      | 2     | 12    | 12   | 0      | 12     | 2    | 12   | 11305.4636 | -0.0150                  |
| <i>para</i> | 13    | 1       | 12      | 1     | 13    | 13   | 0      | 13     | 1    | 13   | 11425.0734 | 0.0070                   |
| <i>para</i> | 13    | 1       | 12      | 1     | 14    | 13   | 0      | 13     | 1    | 14   | 11425.2159 | 0.0190                   |
| <i>para</i> | 13    | 1       | 12      | 1     | 12    | 13   | 0      | 13     | 1    | 12   | 11425.2159 | 0.0089                   |
| <i>orth</i> |       |         |         |       |       |      |        |        |      |      |            |                          |
| <i>o</i>    | 1     | 1       | 1       | 2     | 2     | 0    | 0      | 0      | 2    | 2    | 11478.1597 | 0.0004                   |
| <i>orth</i> |       |         |         |       |       |      |        |        |      |      |            |                          |
| <i>o</i>    | 1     | 1       | 1       | 0     | 1     | 0    | 0      | 0      | 0    | 0    | 11478.1597 | -0.0592                  |
| <i>orth</i> |       |         |         |       |       |      |        |        |      |      |            |                          |
| <i>o</i>    | 1     | 1       | 1       | 2     | 3     | 0    | 0      | 0      | 2    | 2    | 11478.7532 | -0.0068                  |
| <i>orth</i> |       |         |         |       |       |      |        |        |      |      |            |                          |
| <i>o</i>    | 1     | 1       | 1       | 2     | 1     | 0    | 0      | 0      | 2    | 2    | 11479.4960 | -0.0052                  |
| <i>orth</i> |       |         |         |       |       |      |        |        |      |      |            |                          |
| <i>o</i>    | 14    | 1       | 13      | 2     | 16    | 14   | 0      | 14     | 2    | 16   | 11555.1411 | -0.0170                  |
| <i>orth</i> |       |         |         |       |       |      |        |        |      |      |            |                          |
| <i>o</i>    | 14    | 1       | 13      | 0     | 14    | 14   | 0      | 14     | 0    | 14   | 11555.1411 | -0.0075                  |
| <i>orth</i> |       |         |         |       |       |      |        |        |      |      |            |                          |
| <i>o</i>    | 14    | 1       | 13      | 2     | 12    | 14   | 0      | 14     | 2    | 12   | 11555.1411 | 0.0020                   |
| <i>orth</i> |       |         |         |       |       |      |        |        |      |      |            |                          |
| <i>o</i>    | 14    | 1       | 13      | 2     | 13    | 14   | 0      | 14     | 2    | 13   | 11555.2917 | 0.0197                   |
| <i>orth</i> |       |         |         |       |       |      |        |        |      |      |            |                          |
| <i>o</i>    | 14    | 1       | 13      | 2     | 15    | 14   | 0      | 14     | 2    | 15   | 11555.2917 | -0.0089                  |
| <i>orth</i> |       |         |         |       |       |      |        |        |      |      |            |                          |
| <i>o</i>    | 14    | 1       | 13      | 2     | 14    | 14   | 0      | 14     | 2    | 14   | 11555.4344 | 0.0099                   |
| <i>para</i> | 15    | 1       | 14      | 1     | 15    | 15   | 0      | 15     | 1    | 15   | 11695.6946 | 0.0091                   |
| <i>para</i> | 15    | 1       | 14      | 1     | 16    | 15   | 0      | 15     | 1    | 16   | 11695.8496 | 0.0278                   |

|             | $J''$ | $K_a''$ | $K_c''$ | $I''$ | $F''$ | $J'$ | $K_a'$ | $K_c'$ | $I'$ | $F'$ | (MHz)      | $\nu_{obs} - \nu_{calc}$ |
|-------------|-------|---------|---------|-------|-------|------|--------|--------|------|------|------------|--------------------------|
| <i>para</i> | 15    | 1       | 14      | 1     | 14    | 15   | 0      | 15     | 1    | 14   | 11695.8496 | 0.0187                   |
| <i>orth</i> |       |         |         |       |       |      |        |        |      |      |            |                          |
| <i>o</i>    | 16    | 1       | 15      | 2     | 18    | 16   | 0      | 16     | 2    | 18   | 11846.8990 | -0.0194                  |
| <i>orth</i> |       |         |         |       |       |      |        |        |      |      |            |                          |
| <i>o</i>    | 16    | 1       | 15      | 0     | 16    | 16   | 0      | 16     | 0    | 16   | 11846.8990 | -0.0107                  |
| <i>orth</i> |       |         |         |       |       |      |        |        |      |      |            |                          |
| <i>o</i>    | 16    | 1       | 15      | 2     | 14    | 16   | 0      | 16     | 2    | 14   | 11846.8990 | -0.0020                  |
| <i>orth</i> |       |         |         |       |       |      |        |        |      |      |            |                          |
| <i>o</i>    | 16    | 1       | 15      | 2     | 15    | 16   | 0      | 16     | 2    | 15   | 11847.0453 | 0.0059                   |
| <i>orth</i> |       |         |         |       |       |      |        |        |      |      |            |                          |
| <i>o</i>    | 16    | 1       | 15      | 2     | 17    | 16   | 0      | 16     | 2    | 17   | 11847.0454 | -0.0200                  |
| <i>orth</i> |       |         |         |       |       |      |        |        |      |      |            |                          |
| <i>o</i>    | 16    | 1       | 15      | 2     | 16    | 16   | 0      | 16     | 2    | 16   | 11847.2036 | 0.0080                   |

3.2  $^{34}\text{S-syn-syn-CDIT}$  ( $J + I_{N_3} = F_1$  and  $F_1 + I_{N_6} = F$ )

PARAMETERS IN FIT (values truncated and Nlines statistics):

|            |                  |                |               |   |
|------------|------------------|----------------|---------------|---|
| 10000      | A / /MHz         | 11042.9488(27) |               | 1 |
| 20000      | B / /MHz         | 438.30798(69)  |               | 2 |
| 30000      | C / /MHz         | 421.6377(14)   |               | 3 |
| 110010000  | 3/2(Xaa)/MHz     | 2.878(12)      |               | 4 |
| -220010000 | 3/2(Xaa) /MHz    | 2.878(12)      | = 1.00000 * 4 |   |
| 110040000  | 1/4(Xbb-Xcc)/MHz | -0.1878(42)    |               | 5 |
| -220040000 | 1/4(Xbb-Xcc)/MHz | -0.1878(42)    | = 1.00000 * 5 |   |
| 1100       | DJK / /kHz       | 1.86(24)       |               | 6 |

MICROWAVE AVG = -0.001051 MHz, IR AVG = 0.00000

MICROWAVE RMS = 0.014575 MHz, IR RMS = 0.00000

END OF ITERATION 1 OLD, NEW RMS ERROR= 0.97169 0.96117

distinct frequency lines in fit: 74

distinct parameters of fit: 6

|                             | upper state | lower state | overall |
|-----------------------------|-------------|-------------|---------|
| limits of quantum number 1: | 1 11        | 0 11        | 0 11    |
| limits of quantum number 2: | 1 1         | 0 0         | 0 1     |
| limits of quantum number 3: | 0 10        | 0 11        | 0 11    |
| limits of quantum number 4: | 0 12        | 0 12        | 0 12    |
| limits of quantum number 5: | 0 13        | 0 13        | 0 13    |

Linelist L2. <sup>34</sup>S-syn-syn-CDIT

| $J''$ | $K''_a$ | $K''_c$ | $F''_1$ | $F''$ | $J'$ | $K'_a$ | $K'_c$ | $F'_1$ | $F'$ | $\nu$ (MHz) | $\nu_{obs} - \nu_{calc}$ |
|-------|---------|---------|---------|-------|------|--------|--------|--------|------|-------------|--------------------------|
| 6     | 1       | 6       | 7       | 8     | 7    | 0      | 7      | 8      | 9    | 4420.5455   | 0.0114                   |
| 6     | 1       | 6       | 7       | 6     | 7    | 0      | 7      | 8      | 7    | 4420.5455   | -0.0030                  |
| 6     | 1       | 6       | 5       | 4     | 7    | 0      | 7      | 6      | 5    | 4420.5455   | -0.0181                  |
| 5     | 1       | 5       | 5       | 5     | 6    | 0      | 6      | 6      | 6    | 5329.1825   | 0.0112                   |
| 5     | 1       | 5       | 6       | 5     | 6    | 0      | 6      | 7      | 6    | 5329.5930   | -0.0055                  |
| 5     | 1       | 5       | 6       | 7     | 6    | 0      | 6      | 7      | 8    | 5329.5930   | 0.0127                   |
| 2     | 1       | 2       | 2       | 2     | 3    | 0      | 3      | 3      | 3    | 8007.5807   | 0.0055                   |
| 2     | 1       | 2       | 2       | 3     | 3    | 0      | 3      | 3      | 4    | 8007.9188   | 0.0121                   |
| 2     | 1       | 2       | 2       | 1     | 3    | 0      | 3      | 3      | 2    | 8007.9188   | -0.0631                  |
| 2     | 1       | 2       | 3       | 3     | 3    | 0      | 3      | 4      | 4    | 8008.0805   | -0.0218                  |
| 2     | 1       | 2       | 1       | 1     | 3    | 0      | 3      | 2      | 2    | 8008.2703   | 0.0004                   |
| 2     | 1       | 2       | 3       | 4     | 3    | 0      | 3      | 4      | 5    | 8008.4472   | -0.0101                  |
| 1     | 1       | 1       | 1       | 1     | 2    | 0      | 2      | 2      | 2    | 8883.4933   | -0.0307                  |
| 1     | 1       | 1       | 1       | 2     | 2    | 0      | 2      | 2      | 2    | 8883.4933   | 0.0289                   |
| 1     | 1       | 1       | 1       | 2     | 2    | 0      | 2      | 2      | 3    | 8883.7420   | -0.0083                  |
| 1     | 1       | 1       | 2       | 3     | 2    | 0      | 2      | 2      | 3    | 8884.3505   | -0.0030                  |
| 1     | 1       | 1       | 2       | 2     | 2    | 0      | 2      | 3      | 3    | 8884.5603   | -0.0020                  |
| 1     | 1       | 1       | 2       | 1     | 2    | 0      | 2      | 2      | 1    | 8884.5603   | -0.0624                  |
| 1     | 1       | 1       | 1       | 2     | 2    | 0      | 2      | 1      | 2    | 8884.9488   | 0.0252                   |
| 1     | 1       | 1       | 1       | 1     | 2    | 0      | 2      | 1      | 2    | 8884.9488   | -0.0344                  |
| 1     | 1       | 1       | 2       | 3     | 2    | 0      | 2      | 3      | 4    | 8885.1715   | -0.0013                  |
| 1     | 1       | 1       | 2       | 1     | 2    | 0      | 2      | 1      | 1    | 8885.5758   | -0.0028                  |
| 1     | 1       | 1       | 0       | 1     | 2    | 0      | 2      | 1      | 1    | 8886.1085   | -0.0133                  |
| 1     | 1       | 1       | 0       | 1     | 2    | 0      | 2      | 1      | 2    | 8886.2710   | 0.0000                   |
| 1     | 1       | 1       | 0       | 1     | 2    | 0      | 2      | 1      | 0    | 8886.6110   | 0.0119                   |
| 1     | 1       | 0       | 2       | 1     | 1    | 0      | 1      | 1      | 0    | 10620.4679  | -0.0273                  |
| 1     | 1       | 0       | 1       | 1     | 1    | 0      | 1      | 1      | 2    | 10620.4679  | 0.0041                   |
| 1     | 1       | 0       | 2       | 3     | 1    | 0      | 1      | 1      | 2    | 10620.7005  | 0.0041                   |
| 1     | 1       | 0       | 2       | 2     | 1    | 0      | 1      | 2      | 2    | 10621.1640  | -0.0204                  |
| 1     | 1       | 0       | 0       | 1     | 1    | 0      | 1      | 1      | 1    | 10621.1640  | 0.0641                   |
| 1     | 1       | 0       | 2       | 1     | 1    | 0      | 1      | 2      | 2    | 10621.3272  | -0.0286                  |

| $J''$ | $K_a''$ | $K_c''$ | $F_1''$ | $F''$ | $J'$ | $K_a'$ | $K_c'$ | $F_1'$ | $F'$ | $\nu$ (MHz) | $\nu_{obs} - \nu_{calc}$ |
|-------|---------|---------|---------|-------|------|--------|--------|--------|------|-------------|--------------------------|
| 1     | 1       | 0       | 1       | 2     | 1    | 0      | 1      | 2      | 3    | 10621.3272  | 0.0278                   |
| 1     | 1       | 0       | 2       | 3     | 1    | 0      | 1      | 2      | 3    | 10621.5611  | 0.0040                   |
| 1     | 1       | 0       | 1       | 0     | 1    | 0      | 1      | 2      | 1    | 10621.5611  | 0.0603                   |
| 1     | 1       | 0       | 2       | 2     | 1    | 0      | 1      | 2      | 1    | 10621.7690  | 0.0110                   |
| 1     | 1       | 0       | 2       | 1     | 1    | 0      | 1      | 2      | 1    | 10621.9401  | 0.0107                   |
| 1     | 1       | 0       | 1       | 1     | 1    | 0      | 1      | 0      | 1    | 10622.3788  | -0.0071                  |
| 1     | 1       | 0       | 1       | 2     | 1    | 0      | 1      | 0      | 1    | 10622.3788  | 0.0178                   |
| 2     | 1       | 1       | 1       | 2     | 2    | 0      | 2      | 2      | 2    | 10636.7189  | -0.0004                  |
| 2     | 1       | 1       | 1       | 1     | 2    | 0      | 2      | 2      | 2    | 10636.8307  | 0.0063                   |
| 2     | 1       | 1       | 1       | 2     | 2    | 0      | 2      | 2      | 3    | 10637.0133  | 0.0079                   |
| 2     | 1       | 1       | 3       | 4     | 2    | 0      | 2      | 2      | 3    | 10637.2415  | -0.0117                  |
| 2     | 1       | 1       | 3       | 2     | 2    | 0      | 2      | 3      | 3    | 10637.5370  | 0.0175                   |
| 2     | 1       | 1       | 2       | 3     | 2    | 0      | 2      | 2      | 2    | 10637.5370  | -0.0047                  |
| 2     | 1       | 1       | 1       | 0     | 2    | 0      | 2      | 1      | 1    | 10637.7922  | -0.0066                  |
| 2     | 1       | 1       | 2       | 3     | 2    | 0      | 2      | 2      | 3    | 10637.7922  | -0.0355                  |
| 2     | 1       | 1       | 2       | 1     | 2    | 0      | 2      | 2      | 1    | 10637.7922  | -0.0560                  |
| 2     | 1       | 1       | 3       | 3     | 2    | 0      | 2      | 3      | 3    | 10637.9732  | 0.0229                   |
| 2     | 1       | 1       | 3       | 4     | 2    | 0      | 2      | 3      | 4    | 10638.0907  | 0.0181                   |
| 2     | 1       | 1       | 3       | 2     | 2    | 0      | 2      | 3      | 2    | 10638.0907  | -0.0430                  |
| 2     | 1       | 1       | 1       | 1     | 2    | 0      | 2      | 1      | 0    | 10638.6326  | 0.0209                   |
| 2     | 1       | 1       | 2       | 3     | 2    | 0      | 2      | 3      | 4    | 10638.6326  | -0.0145                  |
| 2     | 1       | 1       | 2       | 1     | 2    | 0      | 2      | 3      | 2    | 10638.8009  | -0.0033                  |
| 2     | 1       | 1       | 2       | 2     | 2    | 0      | 2      | 1      | 1    | 10639.0667  | 0.0147                   |
| 3     | 1       | 2       | 2       | 3     | 3    | 0      | 3      | 3      | 4    | 10662.0114  | -0.0446                  |
| 3     | 1       | 2       | 2       | 2     | 3    | 0      | 3      | 3      | 3    | 10662.0114  | 0.0362                   |
| 3     | 1       | 2       | 4       | 5     | 3    | 0      | 3      | 3      | 4    | 10662.2666  | -0.0039                  |
| 3     | 1       | 2       | 4       | 3     | 3    | 0      | 3      | 3      | 2    | 10662.2666  | 0.0520                   |
| 3     | 1       | 2       | 3       | 4     | 3    | 0      | 3      | 3      | 3    | 10662.5352  | -0.0761                  |
| 3     | 1       | 2       | 3       | 2     | 3    | 0      | 3      | 3      | 3    | 10662.5352  | 0.0145                   |
| 3     | 1       | 2       | 2       | 1     | 3    | 0      | 3      | 2      | 2    | 10662.5352  | 0.0198                   |
| 3     | 1       | 2       | 2       | 3     | 3    | 0      | 3      | 2      | 2    | 10662.7468  | 0.0222                   |
| 3     | 1       | 2       | 2       | 2     | 3    | 0      | 3      | 2      | 3    | 10663.4203  | 0.0065                   |
| 3     | 1       | 2       | 3       | 3     | 3    | 0      | 3      | 3      | 4    | 10663.4203  | -0.0044                  |

| $J''$ | $K_a''$ | $K_c''$ | $F_1''$ | $F''$ | $J'$ | $K_a'$ | $K_c'$ | $F_1'$ | $F'$ | $\nu$ (MHz) | $\nu_{obs} - \nu_{calc}$ |
|-------|---------|---------|---------|-------|------|--------|--------|--------|------|-------------|--------------------------|
| 3     | 1       | 2       | 3       | 3     | 3    | 0      | 3      | 2      | 2    | 10664.1168  | 0.0235                   |
| 4     | 1       | 3       | 3       | 3     | 4    | 0      | 4      | 4      | 4    | 10695.5454  | 0.0018                   |
| 4     | 1       | 3       | 3       | 4     | 4    | 0      | 4      | 4      | 5    | 10695.5454  | -0.0120                  |
| 4     | 1       | 3       | 5       | 6     | 4    | 0      | 4      | 4      | 5    | 10695.7512  | 0.0167                   |
| 4     | 1       | 3       | 3       | 2     | 4    | 0      | 4      | 3      | 3    | 10695.9136  | 0.0290                   |
| 4     | 1       | 3       | 4       | 5     | 4    | 0      | 4      | 4      | 4    | 10696.0775  | 0.0057                   |
| 4     | 1       | 3       | 3       | 4     | 4    | 0      | 4      | 3      | 3    | 10696.0775  | 0.0179                   |
| 4     | 1       | 3       | 5       | 6     | 4    | 0      | 4      | 5      | 6    | 10696.4969  | -0.0188                  |
| 4     | 1       | 3       | 5       | 4     | 4    | 0      | 4      | 5      | 4    | 10696.4969  | -0.0120                  |
| 4     | 1       | 3       | 3       | 4     | 4    | 0      | 4      | 3      | 4    | 10696.4969  | -0.0100                  |
| 4     | 1       | 3       | 3       | 2     | 4    | 0      | 4      | 3      | 2    | 10696.4969  | -0.0013                  |
| 4     | 1       | 3       | 4       | 4     | 4    | 0      | 4      | 4      | 5    | 10697.0643  | -0.0018                  |
| 4     | 1       | 3       | 3       | 3     | 4    | 0      | 4      | 3      | 2    | 10697.0643  | -0.0795                  |
| 4     | 1       | 3       | 4       | 5     | 4    | 0      | 4      | 5      | 6    | 10697.3199  | -0.0177                  |
| 4     | 1       | 3       | 4       | 3     | 4    | 0      | 4      | 5      | 4    | 10697.3199  | -0.0501                  |
| 4     | 1       | 3       | 4       | 4     | 4    | 0      | 4      | 3      | 3    | 10697.5663  | -0.0019                  |
| 5     | 1       | 4       | 4       | 3     | 5    | 0      | 5      | 4      | 4    | 10737.7980  | 0.0021                   |
| 5     | 1       | 4       | 6       | 5     | 5    | 0      | 5      | 6      | 6    | 10737.7980  | 0.0102                   |
| 5     | 1       | 4       | 4       | 3     | 5    | 0      | 5      | 4      | 3    | 10738.4797  | 0.0479                   |
| 5     | 1       | 4       | 4       | 5     | 5    | 0      | 5      | 4      | 5    | 10738.4797  | 0.0341                   |
| 5     | 1       | 4       | 6       | 5     | 5    | 0      | 5      | 6      | 5    | 10738.4797  | 0.0315                   |
| 5     | 1       | 4       | 6       | 7     | 5    | 0      | 5      | 6      | 7    | 10738.4797  | 0.0202                   |
| 5     | 1       | 4       | 4       | 4     | 5    | 0      | 5      | 4      | 4    | 10738.4797  | -0.0175                  |
| 5     | 1       | 4       | 6       | 6     | 5    | 0      | 5      | 6      | 6    | 10738.4797  | -0.0363                  |
| 5     | 1       | 4       | 5       | 4     | 5    | 0      | 5      | 5      | 4    | 10738.4797  | -0.0502                  |
| 5     | 1       | 4       | 5       | 6     | 5    | 0      | 5      | 5      | 6    | 10738.4797  | -0.0590                  |
| 5     | 1       | 4       | 4       | 4     | 5    | 0      | 5      | 4      | 3    | 10739.1187  | -0.0144                  |
| 5     | 1       | 4       | 5       | 5     | 5    | 0      | 5      | 5      | 6    | 10739.1187  | -0.0005                  |
| 5     | 1       | 4       | 5       | 4     | 5    | 0      | 5      | 6      | 5    | 10739.3144  | -0.0105                  |
| 5     | 1       | 4       | 5       | 6     | 5    | 0      | 5      | 6      | 7    | 10739.3144  | 0.0051                   |
| 5     | 1       | 4       | 5       | 5     | 5    | 0      | 5      | 4      | 4    | 10739.5479  | 0.0251                   |
| 6     | 1       | 5       | 7       | 8     | 6    | 0      | 6      | 7      | 8    | 10788.9690  | 0.0043                   |
| 6     | 1       | 5       | 7       | 6     | 6    | 0      | 6      | 7      | 6    | 10788.9690  | 0.0169                   |



| $J''$ | $K_a''$ | $K_c''$ | $F_1''$ | $F''$ | $J'$ | $K_a'$ | $K_c'$ | $F_1'$ | $F'$ | $\nu$ (MHz) | $\nu_{obs} - \nu_{calc}$ |
|-------|---------|---------|---------|-------|------|--------|--------|--------|------|-------------|--------------------------|
| 6     | 1       | 5       | 5       | 6     | 6    | 0      | 6      | 5      | 6    | 10788.9690  | 0.0192                   |
| 6     | 1       | 5       | 5       | 4     | 6    | 0      | 6      | 5      | 4    | 10788.9690  | 0.0341                   |
| 7     | 1       | 6       | 8       | 9     | 7    | 0      | 7      | 8      | 9    | 10848.1277  | 0.0114                   |
| 7     | 1       | 6       | 8       | 7     | 7    | 0      | 7      | 8      | 7    | 10848.1277  | 0.0241                   |
| 7     | 1       | 6       | 6       | 7     | 7    | 0      | 7      | 6      | 7    | 10848.1277  | 0.0261                   |
| 7     | 1       | 6       | 6       | 5     | 7    | 0      | 7      | 6      | 5    | 10848.1277  | 0.0407                   |
| 8     | 1       | 7       | 9       | 10    | 8    | 0      | 8      | 9      | 10   | 10916.0058  | -0.0095                  |
| 8     | 1       | 7       | 9       | 8     | 8    | 0      | 8      | 9      | 8    | 10916.0058  | 0.0028                   |
| 8     | 1       | 7       | 7       | 8     | 8    | 0      | 8      | 7      | 8    | 10916.0058  | 0.0044                   |
| 8     | 1       | 7       | 7       | 6     | 8    | 0      | 8      | 7      | 6    | 10916.0058  | 0.0184                   |
| 8     | 1       | 7       | 8       | 7     | 8    | 0      | 8      | 8      | 7    | 10916.1251  | -0.0029                  |
| 8     | 1       | 7       | 8       | 9     | 8    | 0      | 8      | 8      | 9    | 10916.1251  | -0.0136                  |
| 9     | 1       | 8       | 8       | 7     | 9    | 0      | 9      | 8      | 7    | 10992.7671  | 0.0153                   |
| 9     | 1       | 8       | 8       | 9     | 9    | 0      | 9      | 8      | 9    | 10992.7671  | 0.0021                   |
| 9     | 1       | 8       | 10      | 9     | 9    | 0      | 9      | 10     | 9    | 10992.7671  | 0.0008                   |
| 9     | 1       | 8       | 8       | 8     | 9    | 0      | 9      | 8      | 8    | 10992.9007  | 0.0322                   |
| 9     | 1       | 8       | 10      | 10    | 9    | 0      | 9      | 10     | 10   | 10992.9007  | 0.0162                   |
| 9     | 1       | 8       | 10      | 10    | 9    | 0      | 9      | 10     | 10   | 10992.9007  | 0.0162                   |
| 9     | 1       | 8       | 9       | 10    | 9    | 0      | 9      | 9      | 10   | 10992.9007  | -0.0073                  |
| 10    | 1       | 9       | 11      | 12    | 10   | 0      | 10     | 11     | 12   | 11078.5223  | -0.0133                  |
| 10    | 1       | 9       | 11      | 10    | 10   | 0      | 10     | 11     | 10   | 11078.5223  | -0.0020                  |
| 10    | 1       | 9       | 9       | 8     | 10   | 0      | 10     | 9      | 8    | 11078.5223  | 0.0115                   |
| 10    | 1       | 9       | 10      | 11    | 10   | 0      | 10     | 10     | 11   | 11078.6608  | -0.0096                  |
| 10    | 1       | 9       | 9       | 9     | 10   | 0      | 10     | 9      | 9    | 11078.6612  | 0.0281                   |
| 10    | 1       | 9       | 11      | 11    | 10   | 0      | 10     | 11     | 11   | 11078.6612  | 0.0133                   |
| 10    | 1       | 9       | 10      | 9     | 10   | 0      | 10     | 10     | 9    | 11078.6612  | 0.0009                   |
| 10    | 1       | 9       | 10      | 10    | 10   | 0      | 10     | 10     | 10   | 11078.7865  | 0.0050                   |
| 11    | 1       | 10      | 12      | 13    | 11   | 0      | 11     | 12     | 13   | 11173.3975  | -0.0355                  |
| 11    | 1       | 10      | 12      | 11    | 11   | 0      | 11     | 12     | 11   | 11173.3975  | -0.0248                  |
| 11    | 1       | 10      | 10      | 9     | 11   | 0      | 11     | 10     | 9    | 11173.3975  | -0.0121                  |
| 11    | 1       | 10      | 10      | 10    | 11   | 0      | 11     | 10     | 10   | 11173.5415  | 0.0048                   |
| 11    | 1       | 10      | 12      | 12    | 11   | 0      | 11     | 12     | 12   | 11173.5415  | -0.0088                  |
| 11    | 1       | 10      | 11      | 10    | 11   | 0      | 11     | 11     | 10   | 11173.5415  | -0.0205                  |

| $J''$ | $K_a''$ | $K_c''$ | $F_1''$ | $F''$ | $J'$ | $K_a'$ | $K_c'$ | $F_1'$ | $F'$ | $\nu$ (MHz) | $\nu_{obs} - \nu_{calc}$ |
|-------|---------|---------|---------|-------|------|--------|--------|--------|------|-------------|--------------------------|
| 11    | 1       | 10      | 11      | 12    | 11   | 0      | 11     | 11     | 12   | 11173.5415  | -0.0302                  |
| 1     | 1       | 1       | 1       | 0     | 0    | 0      | 0      | 1      | 1    | 11463.9059  | -0.0089                  |
| 1     | 1       | 1       | 1       | 1     | 0    | 0      | 0      | 1      | 0    | 11464.1184  | -0.0572                  |
| 1     | 1       | 1       | 1       | 2     | 0    | 0      | 0      | 1      | 2    | 11464.1184  | 0.0027                   |
| 1     | 1       | 1       | 2       | 2     | 0    | 0      | 0      | 1      | 1    | 11464.4970  | -0.0207                  |
| 1     | 1       | 1       | 2       | 3     | 0    | 0      | 0      | 1      | 2    | 11464.7003  | -0.0184                  |
| 1     | 1       | 1       | 2       | 1     | 0    | 0      | 0      | 1      | 1    | 11464.8961  | -0.0236                  |
| 1     | 1       | 1       | 0       | 1     | 0    | 0      | 0      | 1      | 2    | 11465.4479  | -0.0152                  |

### 3.3 <sup>13</sup>C-*syn-syn*-CDIT ( $J + I_{N_3} = F_1$ and $F_1 + I_{N_6} = F$ )

PARAMETERS IN FIT (values truncated and Nlines statistics):

|            |                   |                |               |   |
|------------|-------------------|----------------|---------------|---|
| 10000      | A / /MHz          | 11029.0588(35) |               | 1 |
| 20000      | B / /MHz          | 447.6461(18)   |               | 2 |
| 30000      | C / /MHz          | 430.2687(18)   |               | 3 |
| 110010000  | 3/2(Xaa) /MHz     | 2.943(19)      |               | 4 |
| -220010000 | 3/2(Xaa) /MHz     | 2.943(19)      | = 1.00000 * 4 |   |
| 110040000  | 1/4(Xbb-Xcc)/MHz  | -0.1731(60)    |               | 5 |
| -220040000 | 1/4(Xbb-Xcc) /MHz | -0.1731(60)    | = 1.00000 * 5 |   |
| 1100       | DJK / /kHz        | [-1.861]       |               | 6 |

MICROWAVE AVG = -0.000000 MHz, IR AVG = 0.00000

MICROWAVE RMS = 0.014865 MHz, IR RMS = 0.00000

END OF ITERATION 1 OLD, NEW RMS ERROR= 0.99100 0.99100

distinct frequency lines in fit: 32

distinct parameters of fit: 5

|                             | upper state | lower state | overall |
|-----------------------------|-------------|-------------|---------|
| limits of quantum number 1: | 1 9         | 0 9         | 0 9     |
| limits of quantum number 2: | 1 1         | 0 0         | 0 1     |
| limits of quantum number 3: | 0 8         | 0 9         | 0 9     |
| limits of quantum number 4: | 0 9         | 0 9         | 0 9     |
| limits of quantum number 5: | 0 9         | 0 9         | 0 9     |

frequency range: 8824 11460

Linelist L3.  $^{13}\text{C}$ -syn-syn-CDIT

| $J''$ | $K''_a$ | $K''_c$ | $F''_1$ | $F''$ | $J'$ | $K'_a$ | $K'_c$ | $F'_1$ | $F'$ | $\nu$ (MHz) | $\nu_{obs} - \nu_{calc}$ |
|-------|---------|---------|---------|-------|------|--------|--------|--------|------|-------------|--------------------------|
| 1     | 1       | 1       | 1       | 2     | 2    | 0      | 2      | 2      | 3    | 8824.5748   | -0.0076                  |
| 1     | 1       | 1       | 2       | 2     | 2    | 0      | 2      | 3      | 3    | 8825.3893   | -0.0120                  |
| 1     | 1       | 1       | 2       | 3     | 2    | 0      | 2      | 3      | 4    | 8826.0094   | -0.0114                  |
| 1     | 1       | 1       | 2       | 2     | 2    | 0      | 2      | 3      | 2    | 8826.0094   | -0.0225                  |
| 1     | 1       | 0       | 1       | 1     | 1    | 0      | 1      | 1      | 1    | 10597.9722  | -0.0277                  |
| 1     | 1       | 0       | 2       | 1     | 1    | 0      | 1      | 1      | 0    | 10597.9722  | 0.0012                   |
| 1     | 1       | 0       | 1       | 2     | 1    | 0      | 1      | 1      | 1    | 10597.9722  | 0.0001                   |
| 1     | 1       | 0       | 2       | 3     | 1    | 0      | 1      | 1      | 2    | 10598.1834  | 0.0132                   |
| 1     | 1       | 0       | 2       | 2     | 1    | 0      | 1      | 2      | 2    | 10598.6469  | -0.0169                  |
| 1     | 1       | 0       | 0       | 1     | 1    | 0      | 1      | 1      | 1    | 10598.6469  | 0.0360                   |
| 1     | 1       | 0       | 1       | 2     | 1    | 0      | 1      | 2      | 3    | 10598.8155  | 0.0481                   |
| 1     | 1       | 0       | 2       | 1     | 1    | 0      | 1      | 2      | 2    | 10598.8155  | -0.0386                  |
| 1     | 1       | 0       | 2       | 3     | 1    | 0      | 1      | 2      | 3    | 10599.0432  | -0.0101                  |
| 1     | 1       | 0       | 2       | 2     | 1    | 0      | 1      | 2      | 1    | 10599.2611  | 0.0086                   |
| 1     | 1       | 0       | 2       | 1     | 1    | 0      | 1      | 2      | 1    | 10599.4365  | -0.0062                  |
| 1     | 1       | 0       | 1       | 1     | 1    | 0      | 1      | 0      | 1    | 10599.8587  | -0.0260                  |
| 1     | 1       | 0       | 1       | 2     | 1    | 0      | 1      | 0      | 1    | 10599.8587  | 0.0018                   |
| 2     | 1       | 1       | 3       | 4     | 2    | 0      | 2      | 2      | 3    | 10615.4451  | -0.0047                  |
| 2     | 1       | 1       | 3       | 2     | 2    | 0      | 2      | 2      | 1    | 10615.4451  | 0.0675                   |
| 2     | 1       | 1       | 3       | 2     | 2    | 0      | 2      | 3      | 3    | 10615.7403  | 0.0121                   |
| 2     | 1       | 1       | 2       | 3     | 2    | 0      | 2      | 2      | 2    | 10615.7403  | 0.0150                   |
| 2     | 1       | 1       | 2       | 1     | 2    | 0      | 2      | 2      | 1    | 10615.9785  | -0.0630                  |
| 2     | 1       | 1       | 1       | 0     | 2    | 0      | 2      | 1      | 1    | 10615.9785  | -0.0483                  |
| 2     | 1       | 1       | 2       | 3     | 2    | 0      | 2      | 2      | 3    | 10615.9785  | -0.0403                  |
| 2     | 1       | 1       | 2       | 2     | 2    | 0      | 2      | 2      | 2    | 10615.9785  | 0.0548                   |
| 2     | 1       | 1       | 3       | 3     | 2    | 0      | 2      | 3      | 3    | 10616.1806  | 0.0258                   |
| 2     | 1       | 1       | 3       | 4     | 2    | 0      | 2      | 3      | 4    | 10616.3016  | 0.0108                   |
| 2     | 1       | 1       | 2       | 3     | 2    | 0      | 2      | 3      | 4    | 10616.8485  | -0.0112                  |
| 2     | 1       | 1       | 1       | 1     | 2    | 0      | 2      | 1      | 0    | 10616.8485  | -0.0005                  |
| 2     | 1       | 1       | 2       | 2     | 2    | 0      | 2      | 1      | 1    | 10617.2794  | 0.0113                   |

| $J''$ | $K_a''$ | $K_c''$ | $F_1''$ | $F''$ | $J'$ | $K_a'$ | $K_c'$ | $F_1'$ | $F'$ | $\nu$ (MHz) | $\nu_{obs} - \nu_{calc}$ |
|-------|---------|---------|---------|-------|------|--------|--------|--------|------|-------------|--------------------------|
| 3     | 1       | 2       | 2       | 1     | 3    | 0      | 3      | 2      | 1    | 10642.4125  | 0.0057                   |
| 3     | 1       | 2       | 2       | 3     | 3    | 0      | 3      | 2      | 3    | 10642.4125  | 0.0221                   |
| 3     | 1       | 2       | 4       | 3     | 3    | 0      | 3      | 4      | 3    | 10642.4125  | 0.0271                   |
| 3     | 1       | 2       | 4       | 5     | 3    | 0      | 3      | 4      | 5    | 10642.4125  | 0.0390                   |
| 3     | 1       | 2       | 2       | 2     | 3    | 0      | 3      | 2      | 2    | 10642.4125  | 0.0485                   |
| 3     | 1       | 2       | 2       | 2     | 3    | 0      | 3      | 2      | 3    | 10642.7185  | -0.0079                  |
| 3     | 1       | 2       | 3       | 3     | 3    | 0      | 3      | 3      | 4    | 10642.7185  | 0.0080                   |
| 5     | 1       | 4       | 5       | 5     | 5    | 0      | 5      | 5      | 5    | 10721.1279  | -0.0336                  |
| 5     | 1       | 4       | 5       | 6     | 5    | 0      | 5      | 5      | 6    | 10721.1279  | 0.0085                   |
| 5     | 1       | 4       | 5       | 4     | 5    | 0      | 5      | 5      | 4    | 10721.1279  | 0.0154                   |
| 5     | 1       | 4       | 6       | 6     | 5    | 0      | 5      | 6      | 6    | 10721.1279  | 0.0262                   |
| 5     | 1       | 4       | 4       | 4     | 5    | 0      | 5      | 4      | 4    | 10721.1279  | 0.0410                   |
| 6     | 1       | 5       | 5       | 4     | 6    | 0      | 6      | 5      | 4    | 10773.7903  | 0.0387                   |
| 6     | 1       | 5       | 5       | 6     | 6    | 0      | 6      | 5      | 6    | 10773.7903  | 0.0263                   |
| 6     | 1       | 5       | 7       | 6     | 6    | 0      | 6      | 7      | 6    | 10773.7903  | 0.0244                   |
| 6     | 1       | 5       | 7       | 8     | 6    | 0      | 6      | 7      | 8    | 10773.7903  | 0.0138                   |
| 7     | 1       | 6       | 7       | 8     | 7    | 0      | 7      | 7      | 8    | 10835.5808  | -0.0481                  |
| 7     | 1       | 6       | 7       | 6     | 7    | 0      | 7      | 7      | 6    | 10835.5808  | -0.0388                  |
| 7     | 1       | 6       | 8       | 8     | 7    | 0      | 7      | 8      | 8    | 10835.5808  | -0.0263                  |
| 7     | 1       | 6       | 6       | 6     | 7    | 0      | 7      | 6      | 6    | 10835.5808  | -0.0103                  |
| 7     | 1       | 6       | 8       | 9     | 7    | 0      | 7      | 8      | 9    | 10835.5808  | 0.0500                   |
| 7     | 1       | 6       | 8       | 7     | 7    | 0      | 7      | 8      | 7    | 10835.5808  | 0.0609                   |
| 7     | 1       | 6       | 6       | 5     | 7    | 0      | 7      | 6      | 5    | 10835.5808  | 0.0751                   |
| 7     | 1       | 6       | 7       | 7     | 7    | 0      | 7      | 7      | 7    | 10835.7093  | 0.0058                   |
| 8     | 1       | 7       | 7       | 7     | 8    | 0      | 8      | 7      | 7    | 10906.4933  | -0.0079                  |
| 8     | 1       | 7       | 9       | 9     | 8    | 0      | 8      | 9      | 9    | 10906.4933  | -0.0230                  |
| 8     | 1       | 7       | 8       | 7     | 8    | 0      | 8      | 8      | 7    | 10906.4933  | -0.0352                  |
| 8     | 1       | 7       | 8       | 9     | 8    | 0      | 8      | 8      | 9    | 10906.4933  | -0.0445                  |
| 9     | 1       | 8       | 9       | 9     | 9    | 0      | 9      | 9      | 9    | 10986.7980  | -0.0101                  |
| 1     | 1       | 1       | 1       | 0     | 0    | 0      | 0      | 1      | 1    | 11458.6422  | -0.0254                  |
| 1     | 1       | 1       | 1       | 1     | 0    | 0      | 0      | 1      | 0    | 11458.8639  | -0.0621                  |
| 1     | 1       | 1       | 1       | 2     | 0    | 0      | 0      | 1      | 2    | 11458.8639  | -0.0027                  |
| 1     | 1       | 1       | 2       | 2     | 0    | 0      | 0      | 1      | 1    | 11459.2558  | -0.0090                  |

|       |         |         |         |       |      |        |        |        |      |             |                          |
|-------|---------|---------|---------|-------|------|--------|--------|--------|------|-------------|--------------------------|
| 1     | 1       | 1       | 2       | 3     | 0    | 0      | 0      | 1      | 2    | 11459.4591  | -0.0049                  |
| $J''$ | $K_a''$ | $K_c''$ | $F_1''$ | $F''$ | $J'$ | $K_a'$ | $K_c'$ | $F_1'$ | $F'$ | $\nu$ (MHz) | $\nu_{obs} - \nu_{calc}$ |
| 1     | 1       | 1       | 2       | 1     | 0    | 0      | 0      | 1      | 1    | 11459.6598  | -0.0031                  |
| 1     | 1       | 1       | 0       | 1     | 0    | 0      | 0      | 1      | 2    | 11460.1987  | -0.0025                  |

### 3.4 $^{15}\text{N}$ -*syn-syn*-CDIT ( $J + I_N = F$ )

PARAMETERS IN FIT (values truncated and Nlines statistics):

|           |                           |                |   |
|-----------|---------------------------|----------------|---|
| 10000     | A / /MHz                  | 11002.9064(90) | 1 |
| 20000     | B / /MHz                  | 449.3188(98)   | 2 |
| 30000     | C / /MHz                  | 431.7588(90)   | 3 |
| 110010000 | 1.5 Chi.aa) /MHz          | [ 2.9805]      | 4 |
| 110040000 | 0.25 (Chi.bb-Chi.cc) /MHz | [-0.18775]     | 5 |
| 1100      | DJK / /kHz                | [-1.861]       | 6 |

MICROWAVE AVG = -0.000000 MHz, IR AVG = 0.00000

MICROWAVE RMS = 0.010786 MHz, IR RMS = 0.00000

END OF ITERATION 2 OLD, NEW RMS ERROR= 0.71908 0.71908

distinct frequency lines in fit: 6

distinct parameters of fit: 3

|                             | upper state | lower state | overall |
|-----------------------------|-------------|-------------|---------|
| limits of quantum number 1: | 1 6         | 0 6         | 0 6     |
| limits of quantum number 2: | 1 1         | 0 0         | 0 1     |
| limits of quantum number 3: | 0 5         | 0 6         | 0 6     |
| limits of quantum number 4: | 1 6         | 1 6         | 1 6     |

frequency range: 10571 11434

Linelist L4.  $^{15}\text{N}$ -*syn-syn*-CDIT

| $J''$ | $K_a''$ | $K_c''$ | $F''$ | $J'$ | $K_a'$ | $K_c'$ | $F'$ | $\nu$ (MHz) | $\nu_{obs} - \nu_{calc}$ |
|-------|---------|---------|-------|------|--------|--------|------|-------------|--------------------------|
| 1     | 1       | 0       | 2     | 1    | 0      | 1      | 2    | 10571.2864  | 0.0048                   |
| 2     | 1       | 1       | 1     | 2    | 0      | 2      | 1    | 10588.8764  | -0.0185                  |
| 3     | 1       | 2       | 4     | 3    | 0      | 3      | 4    | 10615.1932  | 0.0175                   |
| 5     | 1       | 4       | 4     | 5    | 0      | 5      | 4    | 10694.7015  | -0.0044                  |
| 6     | 1       | 5       | 6     | 6    | 0      | 6      | 6    | 10748.0891  | 0.0006                   |
| 1     | 1       | 1       | 2     | 0    | 0      | 0      | 1    | 11434.7375  | 0.0000                   |



3.5 *syn-anti*-CDIT ( $J + I_{N_3} = F_1$  and  $F_1 + I_{N_6} = F$ )

PARAMETERS IN FIT (values truncated and Nlines statistics):

|                                        |                   |                         |         |
|----------------------------------------|-------------------|-------------------------|---------|
| 10000                                  | A / /MHz          | 2938.6797(15)           | 1       |
| 20000                                  | B / /MHz          | 626.51962(71)           | 2       |
| 30000                                  | C / /MHz          | 516.14194(50)           | 3       |
| 110010000                              | 3/2(Xaa) /MHz     | 2.618(16)               | 4       |
| 110040000                              | 1/4(Xbb-Xcc) /MHz | -0.1596(45)             | 5       |
| 220010000                              | 3/2(Xaa) /MHz     | [ 0.]                   | 6       |
| 220040000                              | 1/4(Xbb-Xcc) /MHz | 0.2203(57)              | 7       |
| 1100                                   | DJK / /kHz        | -3.099(39)              | 8       |
| 200                                    | DJ / /kHz         | 0.2008(52)              | 9       |
| 2000                                   | DK / /MHz         | -0.02074(16)            | 10      |
| 40100                                  | d1 / /kHz         | -0.0779(19)             | 11      |
| MICROWAVE AVG =                        |                   | -0.000349 MHz, IR AVG = | 0.00000 |
| MICROWAVE RMS =                        |                   | 0.016327 MHz, IR RMS =  | 0.00000 |
| END OF ITERATION 7 OLD, NEW RMS ERROR= |                   | 1.08849                 | 1.08849 |

distinct frequency lines in fit: 98

distinct parameters of fit: 10

|                             | upper state | lower state | overall |
|-----------------------------|-------------|-------------|---------|
| limits of quantum number 1: | 1 10        | 0 9         | 0 10    |
| limits of quantum number 2: | 0 3         | 0 2         | 0 3     |
| limits of quantum number 3: | 0 10        | 0 9         | 0 10    |
| limits of quantum number 4: | 0 10        | 0 9         | 0 10    |
| limits of quantum number 5: | 1 11        | 0 10        | 0 11    |

frequency range: 2422 11963

Linelist L5. *syn-anti*-CDIT

| $J''$ | $K''_a$ | $K''_c$ | $F''_1$ | $F''$ | $J'$ | $K'_a$ | $K'_c$ | $F'_1$ | $F'$ | $\nu$ (MHz) | $\nu_{obs} - \nu_{calc}$ |
|-------|---------|---------|---------|-------|------|--------|--------|--------|------|-------------|--------------------------|
| 1     | 1       | 0       | 2       | 1     | 1    | 0      | 1      | 1      | 0    | 2422.1900   | -0.0184                  |
| 1     | 1       | 0       | 1       | 1     | 1    | 0      | 1      | 2      | 1    | 2422.4504   | -0.0067                  |
| 1     | 1       | 0       | 1       | 2     | 1    | 0      | 1      | 2      | 3    | 2422.4504   | 0.0157                   |
| 1     | 1       | 0       | 2       | 2     | 1    | 0      | 1      | 2      | 2    | 2422.5764   | -0.0103                  |
| 1     | 1       | 0       | 0       | 1     | 1    | 0      | 1      | 2      | 1    | 2422.9420   | 0.0024                   |
| 1     | 1       | 0       | 1       | 2     | 1    | 0      | 1      | 0      | 1    | 2423.2048   | -0.0152                  |
| 1     | 1       | 0       | 2       | 2     | 1    | 0      | 1      | 0      | 1    | 2423.3865   | 0.0144                   |
| 4     | 0       | 4       | 3       | 4     | 3    | 1      | 3      | 4      | 3    | 2479.0136   | -0.0077                  |
| 4     | 0       | 4       | 3       | 3     | 3    | 1      | 3      | 2      | 2    | 2479.0136   | 0.0037                   |
| 4     | 0       | 4       | 4       | 4     | 3    | 1      | 3      | 3      | 3    | 2479.2595   | -0.0074                  |
| 2     | 1       | 1       | 3       | 3     | 2    | 0      | 2      | 3      | 2    | 2536.7151   | 0.0028                   |
| 2     | 1       | 1       | 2       | 1     | 2    | 0      | 2      | 2      | 1    | 2536.7151   | 0.0104                   |
| 2     | 1       | 1       | 1       | 2     | 2    | 0      | 2      | 1      | 2    | 2536.8960   | -0.0107                  |
| 2     | 1       | 1       | 1       | 2     | 2    | 0      | 2      | 1      | 1    | 2536.8960   | -0.0077                  |
| 2     | 1       | 1       | 3       | 2     | 2    | 0      | 2      | 3      | 2    | 2536.8960   | 0.0244                   |
| 3     | 1       | 2       | 4       | 4     | 3    | 0      | 3      | 4      | 4    | 2715.1840   | -0.0008                  |
| 3     | 1       | 2       | 3       | 3     | 3    | 0      | 3      | 3      | 3    | 2715.1840   | -0.0040                  |
| 3     | 1       | 2       | 2       | 2     | 3    | 0      | 3      | 2      | 2    | 2715.1840   | -0.0221                  |
| 3     | 1       | 2       | 4       | 5     | 3    | 0      | 3      | 4      | 5    | 2715.3646   | 0.0263                   |
| 3     | 1       | 2       | 3       | 2     | 3    | 0      | 3      | 3      | 2    | 2715.3646   | 0.0171                   |
| 3     | 1       | 2       | 4       | 3     | 3    | 0      | 3      | 4      | 3    | 2715.3646   | -0.0075                  |
| 4     | 1       | 3       | 4       | 4     | 4    | 0      | 4      | 4      | 4    | 2966.2496   | -0.0466                  |
| 4     | 1       | 3       | 5       | 5     | 4    | 0      | 4      | 5      | 5    | 2966.2496   | 0.0107                   |
| 4     | 1       | 3       | 3       | 3     | 4    | 0      | 4      | 3      | 3    | 2966.2496   | 0.0150                   |
| 4     | 1       | 3       | 4       | 5     | 4    | 0      | 4      | 4      | 5    | 2966.4576   | 0.0154                   |
| 4     | 1       | 3       | 5       | 4     | 4    | 0      | 4      | 5      | 4    | 2966.4576   | 0.0172                   |
| 4     | 1       | 3       | 4       | 3     | 4    | 0      | 4      | 4      | 4    | 2966.4576   | 0.0094                   |
| 4     | 1       | 3       | 3       | 2     | 4    | 0      | 4      | 3      | 2    | 2966.4576   | 0.0141                   |
| 5     | 1       | 4       | 4       | 4     | 5    | 0      | 5      | 4      | 4    | 3300.1086   | -0.0109                  |
| 5     | 1       | 4       | 6       | 6     | 5    | 0      | 5      | 6      | 6    | 3300.1086   | -0.0237                  |
| 5     | 1       | 4       | 5       | 5     | 5    | 0      | 5      | 5      | 5    | 3300.2085   | -0.0154                  |

|   |   |   |   |    |   |   |   |   |    |           |         |
|---|---|---|---|----|---|---|---|---|----|-----------|---------|
| 5 | 1 | 4 | 5 | 6  | 5 | 0 | 5 | 5 | 6  | 3300.3899 | -0.0034 |
| 1 | 1 | 1 | 1 | 2  | 0 | 0 | 0 | 1 | 2  | 3454.5288 | 0.0167  |
| 1 | 1 | 1 | 0 | 1  | 0 | 0 | 0 | 1 | 2  | 3455.4383 | 0.0197  |
| 6 | 1 | 5 | 5 | 5  | 6 | 0 | 6 | 5 | 5  | 3728.0243 | 0.0158  |
| 6 | 1 | 5 | 7 | 7  | 6 | 0 | 6 | 7 | 7  | 3728.0243 | -0.0001 |
| 6 | 1 | 5 | 5 | 6  | 6 | 0 | 6 | 5 | 5  | 3728.1419 | 0.0038  |
| 6 | 1 | 5 | 6 | 7  | 6 | 0 | 6 | 6 | 6  | 3728.2667 | -0.0008 |
| 6 | 1 | 5 | 6 | 7  | 6 | 0 | 6 | 6 | 7  | 3728.3590 | 0.0278  |
| 5 | 0 | 5 | 4 | 5  | 4 | 1 | 4 | 5 | 6  | 3774.0417 | -0.0207 |
| 5 | 0 | 5 | 6 | 6  | 4 | 1 | 4 | 5 | 5  | 3774.0417 | -0.0358 |
| 5 | 0 | 5 | 5 | 5  | 4 | 1 | 4 | 4 | 4  | 3774.2252 | -0.0259 |
| 7 | 1 | 6 | 8 | 8  | 7 | 0 | 7 | 8 | 8  | 4260.2846 | 0.0169  |
| 7 | 1 | 6 | 6 | 7  | 7 | 0 | 7 | 6 | 7  | 4260.4433 | -0.0187 |
| 7 | 1 | 6 | 7 | 8  | 7 | 0 | 7 | 7 | 8  | 4260.6200 | 0.0071  |
| 2 | 1 | 2 | 1 | 2  | 1 | 0 | 1 | 1 | 2  | 4486.5126 | 0.0148  |
| 2 | 1 | 2 | 3 | 3  | 1 | 0 | 1 | 1 | 2  | 4486.6855 | -0.0107 |
| 2 | 1 | 2 | 2 | 2  | 1 | 0 | 1 | 1 | 1  | 4486.8704 | -0.0099 |
| 2 | 1 | 2 | 3 | 4  | 1 | 0 | 1 | 2 | 3  | 4487.1317 | 0.0156  |
| 2 | 1 | 2 | 1 | 2  | 1 | 0 | 1 | 0 | 1  | 4487.8222 | 0.0153  |
| 2 | 1 | 2 | 1 | 1  | 1 | 0 | 1 | 0 | 1  | 4487.8222 | -0.0238 |
| 6 | 0 | 6 | 5 | 5  | 5 | 1 | 5 | 4 | 4  | 5078.4935 | -0.0020 |
| 6 | 0 | 6 | 6 | 6  | 5 | 1 | 5 | 5 | 5  | 5078.6394 | 0.0099  |
| 3 | 1 | 3 | 3 | 4  | 2 | 0 | 2 | 2 | 3  | 5465.5089 | 0.0216  |
| 3 | 1 | 3 | 2 | 2  | 2 | 0 | 2 | 3 | 2  | 5465.7091 | 0.0086  |
| 3 | 1 | 3 | 4 | 4  | 2 | 0 | 2 | 3 | 3  | 5465.8525 | 0.0253  |
| 3 | 1 | 3 | 2 | 1  | 2 | 0 | 2 | 1 | 1  | 5465.8525 | 0.0149  |
| 3 | 1 | 3 | 4 | 4  | 2 | 0 | 2 | 3 | 4  | 5465.8525 | 0.0194  |
| 3 | 1 | 3 | 2 | 1  | 2 | 0 | 2 | 1 | 0  | 5465.8525 | 0.0073  |
| 3 | 1 | 3 | 3 | 4  | 2 | 0 | 2 | 3 | 4  | 5466.0391 | -0.0047 |
| 9 | 1 | 8 | 9 | 9  | 9 | 0 | 9 | 9 | 9  | 5662.9499 | -0.0069 |
| 9 | 1 | 8 | 9 | 10 | 9 | 0 | 9 | 9 | 10 | 5663.1756 | -0.0179 |
| 8 | 2 | 6 | 7 | 8  | 8 | 1 | 7 | 7 | 8  | 5970.9827 | -0.0182 |
| 8 | 2 | 6 | 7 | 6  | 8 | 1 | 7 | 7 | 6  | 5970.9827 | -0.0142 |
| 8 | 2 | 6 | 9 | 10 | 8 | 1 | 7 | 9 | 10 | 5970.9827 | -0.0064 |

|   |   |   |   |    |   |   |   |   |   |           |         |
|---|---|---|---|----|---|---|---|---|---|-----------|---------|
| 6 | 2 | 4 | 6 | 6  | 6 | 1 | 5 | 6 | 6 | 6239.0766 | -0.0190 |
| 6 | 2 | 4 | 7 | 7  | 6 | 1 | 5 | 7 | 7 | 6239.2488 | -0.0320 |
| 7 | 0 | 7 | 7 | 7  | 6 | 1 | 6 | 6 | 6 | 6378.6980 | -0.0352 |
| 7 | 0 | 7 | 8 | 7  | 6 | 1 | 6 | 7 | 6 | 6378.6980 | -0.0233 |
| 7 | 0 | 7 | 8 | 9  | 6 | 1 | 6 | 7 | 8 | 6378.6980 | -0.0097 |
| 7 | 0 | 7 | 6 | 7  | 6 | 1 | 6 | 5 | 6 | 6378.6980 | -0.0047 |
| 4 | 1 | 4 | 4 | 5  | 3 | 0 | 3 | 3 | 4 | 6395.3961 | 0.0156  |
| 4 | 1 | 4 | 3 | 2  | 3 | 0 | 3 | 2 | 1 | 6395.5927 | -0.0183 |
| 4 | 1 | 4 | 4 | 5  | 3 | 0 | 3 | 4 | 5 | 6395.9362 | -0.0136 |
| 5 | 2 | 3 | 5 | 5  | 5 | 1 | 4 | 5 | 5 | 6424.0787 | 0.0092  |
| 5 | 2 | 3 | 6 | 6  | 5 | 1 | 4 | 6 | 6 | 6424.3310 | 0.0061  |
| 5 | 2 | 3 | 6 | 7  | 5 | 1 | 4 | 6 | 6 | 6424.3310 | -0.0369 |
| 4 | 2 | 2 | 4 | 4  | 4 | 1 | 3 | 4 | 4 | 6614.8737 | 0.0168  |
| 4 | 2 | 2 | 5 | 5  | 4 | 1 | 3 | 5 | 5 | 6615.2343 | 0.0156  |
| 3 | 2 | 1 | 4 | 4  | 3 | 1 | 2 | 4 | 4 | 6792.6605 | 0.0004  |
| 3 | 2 | 1 | 2 | 2  | 3 | 1 | 2 | 2 | 2 | 6792.8327 | -0.0024 |
| 2 | 2 | 0 | 3 | 3  | 2 | 1 | 1 | 3 | 3 | 6940.4017 | 0.0131  |
| 2 | 2 | 1 | 2 | 3  | 2 | 1 | 2 | 2 | 3 | 7266.7666 | -0.0074 |
| 2 | 2 | 1 | 2 | 1  | 2 | 1 | 2 | 2 | 1 | 7266.7666 | -0.0254 |
| 2 | 2 | 1 | 2 | 3  | 2 | 1 | 2 | 3 | 4 | 7266.9813 | -0.0085 |
| 2 | 2 | 1 | 2 | 1  | 2 | 1 | 2 | 1 | 0 | 7267.1307 | -0.0363 |
| 2 | 2 | 1 | 3 | 4  | 2 | 1 | 2 | 2 | 3 | 7267.3212 | -0.0138 |
| 2 | 2 | 1 | 1 | 1  | 2 | 1 | 2 | 1 | 0 | 7268.0233 | -0.0164 |
| 5 | 1 | 5 | 5 | 6  | 4 | 0 | 4 | 4 | 5 | 7284.4296 | 0.0036  |
| 5 | 1 | 5 | 6 | 7  | 4 | 0 | 4 | 5 | 6 | 7284.5772 | 0.0125  |
| 5 | 1 | 5 | 4 | 3  | 4 | 0 | 4 | 3 | 2 | 7284.5772 | -0.0223 |
| 3 | 2 | 2 | 2 | 3  | 3 | 1 | 3 | 2 | 3 | 7435.5717 | 0.0051  |
| 4 | 2 | 3 | 4 | 5  | 4 | 1 | 4 | 4 | 5 | 7660.5124 | -0.0209 |
| 4 | 2 | 3 | 4 | 3  | 4 | 1 | 4 | 4 | 3 | 7660.5276 | -0.0362 |
| 4 | 2 | 3 | 5 | 5  | 4 | 1 | 4 | 5 | 5 | 7660.5276 | -0.0276 |
| 4 | 2 | 3 | 3 | 3  | 4 | 1 | 4 | 3 | 3 | 7660.5755 | -0.0289 |
| 8 | 0 | 8 | 7 | 8  | 7 | 1 | 7 | 6 | 7 | 7662.3325 | 0.0149  |
| 8 | 0 | 8 | 9 | 10 | 7 | 1 | 7 | 8 | 9 | 7662.3325 | 0.0126  |
| 8 | 0 | 8 | 8 | 8  | 7 | 1 | 7 | 7 | 7 | 7662.3325 | -0.0031 |

|   |   |   |    |    |   |   |   |   |   |            |         |
|---|---|---|----|----|---|---|---|---|---|------------|---------|
| 5 | 2 | 4 | 6  | 6  | 5 | 1 | 5 | 6 | 6 | 7943.9903  | 0.0226  |
| 5 | 2 | 4 | 6  | 5  | 5 | 1 | 5 | 6 | 5 | 7944.1373  | -0.0084 |
| 6 | 1 | 6 | 7  | 8  | 5 | 0 | 5 | 6 | 7 | 8143.3137  | 0.0015  |
| 6 | 1 | 6 | 6  | 6  | 5 | 0 | 5 | 5 | 5 | 8143.3137  | 0.0061  |
| 6 | 1 | 6 | 5  | 4  | 5 | 0 | 5 | 4 | 3 | 8143.3137  | -0.0201 |
| 6 | 2 | 5 | 5  | 5  | 6 | 1 | 6 | 5 | 5 | 8286.3926  | 0.0331  |
| 6 | 2 | 5 | 7  | 7  | 6 | 1 | 6 | 7 | 7 | 8286.3926  | 0.0386  |
| 7 | 2 | 6 | 7  | 7  | 7 | 1 | 7 | 7 | 7 | 8688.3111  | 0.0119  |
| 7 | 2 | 6 | 7  | 6  | 7 | 1 | 7 | 7 | 6 | 8688.4923  | 0.0172  |
| 9 | 0 | 9 | 9  | 10 | 8 | 1 | 8 | 8 | 9 | 8920.2199  | -0.0121 |
| 9 | 0 | 9 | 9  | 9  | 8 | 1 | 8 | 8 | 8 | 8920.2199  | 0.0333  |
| 7 | 1 | 7 | 7  | 6  | 6 | 0 | 6 | 6 | 5 | 8984.1318  | -0.0037 |
| 7 | 1 | 7 | 7  | 7  | 6 | 0 | 6 | 6 | 6 | 8984.2510  | 0.0011  |
| 7 | 1 | 7 | 6  | 5  | 6 | 0 | 6 | 5 | 6 | 8984.2510  | 0.0025  |
| 7 | 1 | 7 | 8  | 9  | 6 | 0 | 6 | 7 | 8 | 8984.2510  | 0.0042  |
| 7 | 1 | 7 | 8  | 7  | 6 | 0 | 6 | 7 | 6 | 8984.2510  | 0.0170  |
| 7 | 1 | 7 | 6  | 6  | 6 | 0 | 6 | 5 | 5 | 8984.3432  | -0.0343 |
| 7 | 1 | 7 | 8  | 8  | 6 | 0 | 6 | 7 | 7 | 8984.3432  | -0.0071 |
| 2 | 2 | 1 | 2  | 1  | 1 | 1 | 0 | 1 | 0 | 9331.7511  | 0.0066  |
| 2 | 2 | 1 | 3  | 2  | 1 | 1 | 0 | 0 | 1 | 9331.7511  | 0.0237  |
| 2 | 2 | 1 | 3  | 3  | 1 | 1 | 0 | 2 | 2 | 9332.0921  | 0.0118  |
| 2 | 2 | 1 | 1  | 1  | 1 | 1 | 0 | 1 | 0 | 9332.5976  | -0.0196 |
| 8 | 1 | 8 | 9  | 8  | 7 | 0 | 7 | 8 | 7 | 9820.4055  | -0.0115 |
| 8 | 1 | 8 | 8  | 9  | 7 | 0 | 7 | 7 | 8 | 9820.4055  | 0.0609  |
| 3 | 2 | 2 | 3  | 3  | 2 | 1 | 1 | 2 | 2 | 10364.0055 | 0.0055  |
| 3 | 2 | 2 | 4  | 4  | 2 | 1 | 1 | 3 | 3 | 10364.4464 | -0.0023 |
| 3 | 2 | 2 | 2  | 1  | 2 | 1 | 1 | 1 | 0 | 10364.4464 | -0.0066 |
| 9 | 1 | 9 | 9  | 10 | 8 | 0 | 8 | 8 | 9 | 10663.8180 | 0.0335  |
| 9 | 1 | 9 | 10 | 9  | 8 | 0 | 8 | 9 | 8 | 10663.8180 | -0.0259 |
| 3 | 2 | 1 | 3  | 4  | 2 | 1 | 2 | 2 | 3 | 10714.4929 | -0.0276 |
| 3 | 2 | 1 | 4  | 3  | 2 | 1 | 2 | 2 | 3 | 10714.4929 | -0.0229 |
| 3 | 2 | 1 | 2  | 2  | 2 | 1 | 2 | 2 | 1 | 10714.4929 | -0.0120 |
| 3 | 2 | 1 | 2  | 3  | 2 | 1 | 2 | 2 | 3 | 10714.4929 | -0.0047 |
| 3 | 2 | 1 | 4  | 4  | 2 | 1 | 2 | 2 | 3 | 10714.4929 | 0.0020  |

|    |   |    |    |    |   |   |   |   |    |            |         |
|----|---|----|----|----|---|---|---|---|----|------------|---------|
| 3  | 2 | 1  | 2  | 1  | 2 | 1 | 2 | 1 | 0  | 10714.9140 | 0.0121  |
| 4  | 2 | 3  | 4  | 3  | 3 | 1 | 2 | 3 | 3  | 11340.7267 | 0.0140  |
| 4  | 2 | 3  | 3  | 4  | 3 | 1 | 2 | 4 | 4  | 11340.9858 | 0.0008  |
| 7  | 3 | 4  | 6  | 7  | 7 | 2 | 5 | 6 | 7  | 11515.6729 | -0.0119 |
| 7  | 3 | 4  | 8  | 8  | 7 | 2 | 5 | 8 | 8  | 11515.6729 | -0.0390 |
| 7  | 3 | 4  | 6  | 6  | 7 | 2 | 5 | 6 | 6  | 11515.6729 | -0.0692 |
| 10 | 1 | 10 | 10 | 11 | 9 | 0 | 9 | 9 | 10 | 11523.8332 | -0.0148 |
| 10 | 1 | 10 | 10 | 9  | 9 | 0 | 9 | 9 | 8  | 11523.8332 | -0.0104 |
| 6  | 3 | 3  | 6  | 6  | 6 | 2 | 4 | 6 | 6  | 11649.6927 | -0.0077 |
| 6  | 3 | 3  | 5  | 6  | 6 | 2 | 4 | 5 | 6  | 11649.9335 | -0.0223 |
| 6  | 3 | 3  | 7  | 7  | 6 | 2 | 4 | 7 | 7  | 11649.9335 | -0.0244 |
| 3  | 3 | 0  | 4  | 4  | 3 | 2 | 1 | 4 | 3  | 11818.9758 | 0.0265  |
| 3  | 3 | 0  | 4  | 3  | 3 | 2 | 1 | 4 | 3  | 11818.9758 | 0.0239  |
| 3  | 3 | 0  | 4  | 4  | 3 | 2 | 1 | 4 | 5  | 11818.9758 | 0.0180  |
| 3  | 3 | 0  | 4  | 4  | 3 | 2 | 1 | 3 | 3  | 11818.9758 | 0.0173  |
| 3  | 3 | 0  | 4  | 5  | 3 | 2 | 1 | 4 | 5  | 11818.9758 | 0.0160  |
| 3  | 3 | 0  | 4  | 3  | 3 | 2 | 1 | 3 | 3  | 11818.9758 | 0.0147  |
| 3  | 3 | 1  | 4  | 4  | 3 | 2 | 2 | 2 | 3  | 11838.1285 | -0.0044 |
| 3  | 3 | 1  | 4  | 4  | 3 | 2 | 2 | 4 | 4  | 11838.1285 | -0.0046 |
| 4  | 3 | 2  | 3  | 2  | 4 | 2 | 3 | 3 | 2  | 11848.7796 | -0.0027 |
| 4  | 3 | 2  | 3  | 4  | 4 | 2 | 3 | 3 | 4  | 11848.7796 | -0.0006 |
| 5  | 3 | 3  | 4  | 3  | 5 | 2 | 4 | 4 | 3  | 11869.8208 | 0.0048  |
| 5  | 3 | 3  | 4  | 5  | 5 | 2 | 4 | 4 | 5  | 11869.8208 | 0.0077  |
| 5  | 3 | 3  | 4  | 4  | 5 | 2 | 4 | 4 | 4  | 11869.8208 | 0.0190  |
| 6  | 3 | 4  | 5  | 6  | 6 | 2 | 5 | 5 | 6  | 11906.2567 | 0.0407  |
| 6  | 3 | 4  | 5  | 4  | 6 | 2 | 5 | 5 | 4  | 11906.2567 | 0.0372  |
| 7  | 3 | 5  | 6  | 7  | 7 | 2 | 6 | 6 | 7  | 11963.3164 | 0.0232  |
| 7  | 3 | 5  | 6  | 5  | 7 | 2 | 6 | 6 | 5  | 11963.3164 | 0.0192  |

#### 4. References

- 1 J. Pfeiffer, C. Trost, A. Pachkovska and F. Tambornino, A Crystallographic, Spectroscopic, and Computational Investigation of Carbonyl and Oxalyl Diisothiocyanate, *Inorg. Chem.*, 2021, **60**, 10722–10728.
- 2 D. Schmitz, V. Alvin Shubert, T. Betz and M. Schnell, Multi-resonance effects within a single chirp in broadband rotational spectroscopy: The rapid adiabatic passage regime for benzonitrile, *J. Mol. Spectrosc.*, 2012, **280**, 77–84.
- 3 C. Pérez, A. Krin, A. L. Steber, J. C. López, Z. Kisiel and M. Schnell, Wetting Camphor: Multi-Isotopic Substitution Identifies the Complementary Roles of Hydrogen Bonding and Dispersive Forces, *J. Phys. Chem. Lett.*, 2016, **7**, 154–160.
- 4 F. Neese, Software update: The ORCA program system—Version 5.0, *WIREs Comput. Mol. Sci.*, 2022, **12**, e1606.
- 5 A. D. Becke, Density-functional thermochemistry. III. The role of exact exchange, *J. Chem. Phys.*, 1993, **98**, 5648–5652.
- 6 S. Grimme and M. Steinmetz, Effects of London dispersion correction in density functional theory on the structures of organic molecules in the gas phase, *Phys. Chem. Chem. Phys.*, 2013, **15**, 16031–16042.
- 7 S. Grimme, J. Antony, S. Ehrlich and H. Krieg, A consistent and accurate ab initio parametrization of density functional dispersion correction (DFT-D) for the 94 elements H-Pu, *J. Chem. Phys.*, 2010, **132**, 154104.
- 8 S. Grimme, S. Ehrlich and L. Goerigk, Effect of the damping function in dispersion corrected density functional theory, *J. Comput. Chem.*, 2011, **32**, 1456–1465.
- 9 R. A. Kendall, T. H. Dunning Jr. and R. J. Harrison, Electron affinities of the first-row atoms revisited. Systematic basis sets and wave functions, *J. Chem. Phys.*, 1992, **96**, 6796–6806.
- 10 C. Møller and M. S. Plesset, Note on an Approximation Treatment for Many-Electron Systems, *Phys. Rev.*, 1934, **46**, 618–622.
- 11 V. Ásgeirsson, B. O. Birgisson, R. Bjornsson, U. Becker, F. Neese, C. Riplinger and H. Jónsson, Nudged Elastic Band Method for Molecular Reactions Using Energy-Weighted Springs Combined with Eigenvector Following, *J. Chem. Theory Comput.*, 2021, **17**,

4929–4945.

- 12 S. Grimme, J. G. Brandenburg, C. Bannwarth and A. Hansen, Consistent structures and interactions by density functional theory with small atomic orbital basis sets, *J. Chem. Phys.*, 2015, **143**, 54107.
- 13 E. F. Pettersen, T. D. Goddard, C. C. Huang, G. S. Couch, D. M. Greenblatt, E. C. Meng and T. E. Ferrin, UCSF Chimera--a visualization system for exploratory research and analysis., *J. Comput. Chem.*, 2004, **25**, 1605–1612.
